***Pseudomonas aeruginosa* displays a dormancy phenotype during long-term survival in water.**

Shawn Lewenza<sup>1,2</sup>, Jason Abboud<sup>2</sup>, Karen Poon<sup>2</sup>, Madison Kobryn<sup>1</sup>, Istvan Humplik<sup>1</sup>, John Rainer Bell<sup>1,2</sup>, Laura Mardan<sup>1</sup>, and Shauna Reckseidler-Zenteno<sup>1,2\*</sup>

<sup>1</sup>Faculty of Science and Technology, Athabasca University, 1 University Drive, Athabasca, Alberta, Canada T9S 3A3

<sup>2</sup> Department of Microbiology, Immunology, and Infectious Diseases, Faculty of Medicine, University of Calgary, 3330 Hospital Drive NW, Calgary, Alberta, Canada T2N 4N1

\*Corresponding author, [shaunaz@athabascau.ca](mailto:shaunaz@athabascau.ca)

**Keywords:** dormancy, *Pseudomonas aeruginosa*, survival, low nutrient environments, water, metabolism, membrane, nosocomial pathogen, gene expression, persistence, reservoir

## ABSTRACT

*Pseudomonas aeruginosa* is capable of long-term survival in water, which may serve as a reservoir for infection. Although viable cell counts of PAO1 incubated in water remain stable throughout 8 weeks, LIVE/DEAD® staining indicated a high proportion of cells stained with propidium iodide (PI). The proportion of PI-stained cells increased by 4 weeks, then decreased again by 8 weeks, suggesting an adaptive response. This was also evident in an observed shift in cell morphology from a rod to a coccoid shape after 8 weeks. Fluorescence-activated cell sorting (FACS) was used to recover PI-stained cells, which were plated and shown to be viable, indicating that PI-stained cells were membrane-compromised but still cultivable. PAO1 mid-log cells in water were labeled with the dsDNA-binding dye PicoGreen® to monitor viability as well as DNA integrity, which demonstrated that the population remains viable and transitions towards increased dsDNA staining. Metabolic activity was found to decrease significantly in water by 4 weeks. The PAO1 outer membrane became less permeable and more resistant to polymyxin B damage in water, and the profile of total membrane lipids changed over time. None of the individual mutants within a library of ~2500 mapped, mini-Tn5-*lux* transposon mutants were found to have decreased survival in water. Among the ~1400 transcriptional *lux* fusions, gene expression in water revealed that the majority of genes were repressed, but subsets of genes were induced at particular time points. In summary, these results indicate that *P. aeruginosa* is dormant in water and this adaptation involves a complex pattern of gene regulation and changes to the cell to promote long-term survival and antibiotic tolerance. The approach of *P. aeruginosa* incubated in water may be useful to study antibiotic tolerance and the mechanisms of dormancy and survival in nutrient limiting conditions.

## 1 INTRODUCTION

2 *Pseudomonas aeruginosa* is a Gram-negative bacterium that is ubiquitous in the environment  
3 and appreciated for its ability to cause disease in plants, insects, animals, and humans [1,2]. This  
4 opportunistic organism is a major cause of nosocomial or hospital-acquired infections, most  
5 notably causing skin infections in burn patients and diabetic foot wounds, infections of indwelling  
6 devices such as catheters, and chronic lung infections in patients with Cystic Fibrosis [3]. Studies  
7 have shown that *P. aeruginosa* may survive for months on hospital surfaces [4]. *P. aeruginosa* is  
8 an archetypal biofilm-forming organism, which is a conserved strategy used for long-term survival  
9 in nature and during infections. *P. aeruginosa* infections are very difficult to treat because the  
10 organism has numerous intrinsic antibiotic resistance mechanisms, and grows as multidrug tolerant  
11 biofilms, thus promoting chronic infections [3].

12 *P. aeruginosa* has been shown to survive in water for over 145 days (20.7 weeks), significantly  
13 longer than two other bacterial pathogens, *Escherichia coli* and *Staphylococcus aureus* [5]. The  
14 ability of the organism to persist at length in water indicates that water may be an environmental  
15 reservoir for *P. aeruginosa*. The microbiome of pristine groundwater is dominated by the  
16 *Pseudomonas* genus, which was shown to represent 10% of all species [6]. Numerous studies have  
17 demonstrated that *P. aeruginosa* can be isolated from hospitals, from the water in intensive care  
18 units, as well as sinks, basins, drains, showers, toilets and bathtubs, leading to transmission of *P.*  
19 *aeruginosa* infections [7,8]. It is therefore important to understand how this organism is able to  
20 survive in water, to better understand the transmission and possibly improve infection control  
21 policies.

22

23           Slow or non-growing states are poorly understood, yet bacteria in nature exist most  
24 commonly in nutrient limited conditions. There are numerous experimental systems used to  
25 study nongrowing bacteria, which include persister cells, starved cells in stationary phase, or the  
26 viable-but-nonculturable (VBNC) state [9]. All of these non-growing states can be considered a  
27 form of dormant bacterial cells. Non-growing persister cells are present in laboratory grown  
28 planktonic and biofilm cultures, and contribute to multidrug antibiotic tolerance and chronic  
29 infections [10]. Persister cells are not utilizing nutrients, producing proteins, synthesizing any  
30 replication machinery, and therefore not multiplying [10,11]. However, starved cells in stationary  
31 phase have also been studied as a model of non-growing cells and were shown to maintain constant  
32 gene expression and protein production during extended starvation periods [12]. Both persister  
33 cells and starved stationary phase cells are dormant growth states that are capable of growth once  
34 they are reintroduced into a nutrient-rich conditions [10,12]. The objective of this study was to  
35 characterize the long-term survival of *P. aeruginosa* in water and to determine if this experimental  
36 system is a useful dormancy model for future studies of bacterial survival in nutrient limiting  
37 conditions.

## 38 MATERIALS AND METHODS

39 **Bacterial strains used in this study.** *P. aeruginosa* PAO1 was utilized as the wild type strain in  
40 this study. PAO1 was grown in Luria broth (LB) and incubated at 37°C with shaking at 250 rpm  
41 overnight. Stationary phase cultures (ON) were obtained following overnight growth in LB and  
42 these were inoculated into water. Logarithmic phase cultures (log) were obtained by sub-culturing  
43 overnight cultures into LB and growing these to an optical density (OD<sub>600</sub>) of 0.5 before being  
44 inoculated into water for experimental procedures. Samples were removed from water at a number  
45 of time points for analysis.

46 **Preparation of water samples and quantitative determination of *P. aeruginosa* viability in**  
47 **water.** Strains were grown overnight or to mid-log in 3mL LB and an aliquot of 1 ml of the cultures  
48 was centrifuged at 13,000 rpm for 3 min., washed three times in sterile distilled H<sub>2</sub>O (sdH<sub>2</sub>O), and  
49 resuspended in a final volume of 1 ml sdH<sub>2</sub>O. The washed culture was used to inoculate sdH<sub>2</sub>O at  
50 a final concentration of 10<sup>7</sup> CFU/ml. The tubes were loosely capped and incubated at room  
51 temperature. Bacterial quantitation of the samples was performed to accurately determine the  
52 CFU/ml at time zero and at various time points in water.

53 **Live/dead staining and fluorescence-activated cell sorting (FACS) of *P. aeruginosa* strains**  
54 **incubated in water.** At each time point, 1 ml of *P. aeruginosa* in water (10<sup>7</sup> CFU) was removed,  
55 centrifuged at 13,000 rpm for 3 min and resuspended in 1 ml of 0.9% saline. Samples were then  
56 subjected to LIVE/DEAD® staining using the BacLight™ kit comprised of SYTO 9 (green) and  
57 propidium iodide (PI; red) (Thermo Fisher), which were added at a final concentration of 30 and  
58 10 μM, respectively. Samples were then subjected to flow cytometry to quantitatively determine  
59 the proportion of SYTO9 and PI-stained cells. Once the proportion of green/red cells was

60 determined, the green and red cell sub-populations were separated into fractions by fluorescence-  
61 activated cell sorting (FACS). The viability of cells in each fraction was determined by serially  
62 diluting and plating of the sorted fractions onto LB agar. The Quant-iT™ PicoGreen® dsDNA  
63 reagent was used to quantitate dsDNA (1 µl of the stock solution was added to 250 µl of bacteria  
64 sample in water) (Thermo Fisher). A total of 50,000 events were acquired for all flow cytometry  
65 experiments in list mode files and analyzed using BD FACS Diva software.

66 **Fluorescence microscopy of live/dead stained cells.** At each time point, 1 ml of the water sample  
67 containing PAO1 was centrifuged and resuspended in 0.9% saline. The LIVE/DEAD® reagents  
68 were added to 10 µl of the sample at a concentration of 30 and 10 µM respectively and 2 µl of the  
69 sample was added to an agarose bed-coated glass slide and sealed with a glass coverslip. Slides  
70 were visualized on a Leica DMI 4000 B wide field fluorescence microscope.

71  
72 **Assessment of ATP production of PAO1 in water.** PAO1 incubated in water was assessed over  
73 time for metabolic activity based on ATP production. ATP production was determined using the  
74 BacTiter-Glo™ Microbial Cell Viability Assay (Promega), which measures the amount of ATP  
75 present in a sample as a function of luminescence. The BacTiter-Glo™ reagent was added to the  
76 PAO1 water sample at a ratio of 1:1 and luminescence was measured in counts per second after 5  
77 min incubation at room temperature.

78  
79 **NPN assay to measure outer membrane (OM) permeability.** OM permeability of PAO1 was  
80 assessed using a previously established protocol [13,14]. Samples of PAO1 in LB or water (1 ml,  
81 10<sup>7</sup> CFU) were centrifuged at 13, 000 rpm for 2 min and cells were resuspended in 5 mM HEPES

82 buffer (pH 7.2) containing 5 mM glucose. Cells were pretreated with sodium azide (0.2%) to  
83 disable active efflux. 1-N-phenyl-naphthylamine (NPN) is a fluorescent dye when integrated into  
84 the hydrophobic environment of bacterial membranes. NPN was added to measure both the  
85 baseline permeability and to measure the outer membrane tolerance to polymyxin B treatment.  
86 After NPN addition, cells were treated with polymyxin B (5 µg/ml) to disrupt the OM, leading to  
87 increased NPN uptake and fluorescence, which was measured using a Spectra Max M2  
88 spectrophotometer using the SoftMax Pro 6 software. The setting for green excitation and emission  
89 spectra were set to 350nm and 420nm respectively, at 30°C. Samples of PAO1 were prepared in  
90 triplicate for each assay, and the assay was performed three times.

91 **Lipid detection of PAO1 cells following incubation in water.** The total lipid profile of PAO1  
92 cells following incubation in water was determined by thin-layer chromatography as previously  
93 described [15]. Total lipids were extracted with chloroform:methanol (1:2), separated using thin  
94 layer chromatography and amino group containing lipids were visualized by spraying with the  
95 ninhydrin reagent (Sigma). Lipids were isolated from PAO1 incubated in water, and from control  
96 PAO1 cultures grown in low and high phosphate BM2-defined growth media [15].

97

98 **Gene expression and survival in water analysis.** All mapped transposon mutants (containing  
99 about 50% transcriptional *lux* fusions) from a previously constructed transposon mutant library  
100 [16] were re-arrayed into a series of 96-well microplates. The mutants are catalogued at  
101 [pseudomonas.pseudomutant.com](http://pseudomonas.pseudomutant.com) and [pseudomonas.com](http://pseudomonas.com) [17]. Mutant strains were first grown in  
102 96-well plates containing 150 µl of LB and incubated overnight at 37°C without shaking.  
103 Overnight cultures were transferred by 48/96 pin stamps into new 96-well plates containing 150  
104 µl of sdH<sub>2</sub>O water, delivering ~10<sup>7</sup> CFU of bacterial cells into each well. Gene expression

105 (luminescence) in water was measured in black, 96-well, clear bottom microplates after  
106 inoculation into water (time 0) and at various time points using a Wallac Victor<sup>3</sup> luminescence  
107 plate reader (PerkinElmer, USA). At each time point, plates were shaken for 5 s in a 0.10 mm-  
108 diameter orbital, followed by absorbance (600 nm) and luminescence (counts per second; CPS)  
109 readings in each of the wells. Gene expression was divided by the absorbance (CPS/OD<sub>600</sub>) to  
110 normalize for differences in cell density. Relative gene expression was determined by calculating  
111 the fold change in expression for each gene at each time point relative to the time zero (T0) time  
112 point. Strains harboring *lux* fusions in genes that demonstrated meaningful fold changes (>2 fold  
113 up or down regulated) were identified. Cluster analysis of gene expression was performed using  
114 TreeView and Cluster software.

## 115 RESULTS

116 ***P. aeruginosa* is capable of long-term survival in water.** PAO1 was grown overnight in LB  
117 medium, washed extensively, and inoculated into water at a concentration of 10<sup>7</sup> CFU/ml and  
118 incubated at room temperature. Bacterial quantitation was performed to determine bacterial  
119 survival over time. The viability of PAO1 remained high over the course of 8 weeks (Fig. 1). Cell  
120 numbers (CFU/ml) on occasion declined modestly by 0.5 - 1 log from the initial inoculum, which  
121 might be due to the use of stationary phase cells as an inoculum, as a small percentage of stationary  
122 phase may be dead or dying. The initial decrease in viability may also be a result of lysis from  
123 osmotic shock (Fig. 1). Generally, viability remained at stable cell numbers for up to 8 weeks (Fig.  
124 1), consistent with a previous study reporting *P. aeruginosa* survival in water for 145 days (20.7  
125 weeks) [5].

126 To increase the robustness of counting viable *P. aeruginosa* cells in water, we assessed the



127 LIVE/DEAD staining patterns of cells in water using the DNA binding dyes SYTO 9 and  
128 propidium iodide (PI). While the majority of cells in water were a homogenous SYTO 9  
129 population, there was also a subpopulation of PI stained cells (Fig. 2A). SYTO 9 is membrane  
130 permeable DNA stain that labels all cells green and PI is a membrane-impermeable, red DNA stain  
131 that was originally used as an indicator of non-viability. However, it is now recognized that PI is  
132 more likely an indicator of outer membrane disruption and increased permeability [18,19]. The  
133 numbers of total cells (green) and non-viable or membrane-compromised cells (red) were  
134 determined. In the early weeks, the proportion of PI-stained cells was low (6-20%), and increased  
135 to ~50% of cells at 4 weeks (Fig. 2C). The PI-stained proportion decreased in the later weeks to  
136 15-30% of the population (Fig. 2C). In general, across all time points, ~75% of cells stained only  
137 with SYTO 9, and ~25% cells were staining with SYTO9 and PI, indicating this subpopulation  
138 was membrane-compromised and permeable to the DNA binding dye PI (Fig. 2D).

### 139 **Fluorescence-activated cell sorting reveals that PI-stained cells are viable.**

140 To determine if PI-stained cells in water were viable, the SYTO 9 positive and SYTO 9/PI  
141 double positive population were separated and sorted into different tubes by FACS analysis. Next,  
142 the PI-stained populations were serially diluted and plated to determine if these cells were viable.  
143 The supposed 'dead' population of PI-stained cells indeed grew and was recovered after plating  
144 on LB agar, indicating that the PI-stained cells were membrane-damaged but viable. While  
145 monitoring the proportion of recoverable PI-staining cells, we observed that up to 100% of PI-  
146 stained cells were recovered after week 4 (Table 1). The percent viability was calculated by  
147 dividing the number of viable cells recovered on agar plates following serial dilution, by the  
148 number of PI-stained cells that were counted and sorted by FACS. At the early 1 week time point,  
149 it appears that over 50% of cells that stained with PI were non-viable, and it appears that *P.*

150 *aeruginosa* undergoes a transition whereby the PI-stained cells after 4 weeks are adapted to  
151 surviving in water and become fully viable (Table 1).

152 Having assessed viability of *P. aeruginosa* in water, we wanted to assess the overall metabolic  
153 activity. At various time points, a sample of PAO1 in water was taken and the ATP reagent from  
154 the BacTiter-Glo™ Microbial Cell Viability Assay from Promega was added at an equal volume.  
155 ATP production was measured in a luminometer as a function of counts per second (cps) of  
156 luminescence. ATP production decreased over time in the water samples from week 1 to 8, which  
157 demonstrates that the population reduced their overall metabolic activity (Table 1), yet were  
158 completely viable after 4 to 8 weeks (Fig. 1, Table 1).

#### 159 ***P. aeruginosa* DNA is intact and may be highly condensed in water.**

160 Further flow cytometry experiments were performed using PicoGreen®, another viability stain  
161 that measures vitality based on intact, dsDNA content. For this experiment, mid-log phase cultures  
162 of PAO1 were inoculated into water for incubation, aliquots were removed over time, stained with  
163 PicoGreen® and subjected to flow cytometry. Overall, PAO1 was confirmed to be viable in water  
164 as the cells stained with PicoGreen®, resulting in strong green fluorescence. However, these  
165 experiments also revealed that PAO1 fluoresced more in water compared to LB, and became more  
166 fluorescent over time, with a 100-fold increase in peak fluorescence comparing cells in LB ( $10^3$ )  
167 to cells inoculated into water ( $10^5$ ) (Fig. 4). By 3 and 4 weeks in water, the peak fluorescence was  
168 found to be  $>10^5$ . The PicoGreen® fluorescence profile was generally lower and more dispersed  
169 when stationary phase cells were incubated in water, as this population contains both living and  
170 dying cells, and likely a mixture of dsDNA and degraded DNA (data not shown). During the 4  
171 week incubation period in water, the picogreen fluorescence profile transitioned to a homogenous,

172 high fluorescence profile, possibly reflecting a transition towards a stable population of dormant  
173 cells and more intact dsDNA. The high fluorescence profile of cells in water for 4 weeks may also  
174 suggest that the DNA structure became more tightly supercoiled and therefore more highly  
175 condensed (Fig. 4). In addition, the side-scatter values (SSC) decreased over time in water  
176 compared to LB (Fig. 4), which may indicate the transition to a smaller cell size, which was  
177 observed in microscopy (Fig. 3).

178

179 **The PAO1 outer membrane is tolerant to polymyxin B after prolonged incubation in water.**

180 Outer membrane permeability of PAO1 was assessed using a previously established method [13].  
181 Cells were pretreated with sodium azide, which blocks active efflux mechanisms, and then exposed  
182 to 1-N-phenylnaphthylamine (NPN). The baseline NPN fluorescence in sodium azide-treated cells  
183 reflects the amount of NPN that penetrates the hydrophobic regions of the membrane, where NPN  
184 becomes fluorescent. Prior to the addition of polymyxin B to disrupt the outer membrane, the  
185 baseline of membrane permeability decreases over time during incubation in water, with very low  
186 NPN fluorescence in cells after 3 weeks in water (Fig. 5A).

187 After the addition of polymyxin B, the outer membrane of mid-log phase PAO1 grown in LB  
188 was disrupted leading to a rapid increase in NPN incorporation and fluorescence (Fig. 5B). The  
189 response of PAO1 after 1 day in water was similar but incorporated less NPN after polymyxin B  
190 treatment, and the even less membrane damage at day 7. Cells incubated in water for 3 and 4 weeks  
191 demonstrated a polymyxin B resistance phenotype and showed very little NPN fluorescence (Fig.  
192 5). This data suggests that the outer membrane of PAO1 is altered in this low nutrient environment,  
193 resulting in a reduction in membrane permeability and an increase in tolerance to disruption by the

194 antimicrobial peptide polymyxin B.

195

196 **Differential expression patterns of *P. aeruginosa* PAO1 genes in water.**

197 To assess the gene expression patterns of PAO1 in water, we incubated a previously described  
198 collection of mini-Tn5-*luxCDABE* transposon mutants of *P. aeruginosa* [16]. This transposon  
199 mutant library of *P. aeruginosa* PAO1 is a collection of random transposon mutants, where each  
200 mini-Tn5-*lux* insertion creates an active transcriptional *luxCDABE* fusion if inserted into the same  
201 orientation as the gene. The mini-Tn5-*luxCDABE* library in PAO1 contains about ~2,500 mutants  
202 with mapped Tn insertion sites, and ~1,400 of these were transcriptional *lux* fusions [16]. This  
203 entire collection of ~2500 mini-Tn5-*lux* mutants was screened for mutants with impaired survival  
204 in water, however no mutants were identified that had significant defects in survival during long-  
205 term incubation in water. This observation suggests that single gene knockouts cannot result in  
206 survival defects, or that the genes of interest were not present in our mutant library.

207 The collection of ~1,400 mapped transcriptional *lux* fusions were inoculated into 96-well  
208 plates containing sterile water ( $10^7$  CFU/well) and incubated at room temperature. The gene  
209 expression patterns were determined by measuring absorbance ( $OD_{600}$ ) and luminescence (CPS)  
210 at 0, 0.3, 1, 3, 5, 7, 13, 20, 26, and 34 days. The data was analyzed by dividing luminescence by  
211 absorbance to correct for differences in cell density, and the fold changes of expression were  
212 determined by comparing all values to time 0 (Sup Table 1). Cluster analysis of gene expression  
213 was performed to assess the overall trends in gene expression.

214 The vast majority of genes were repressed (orange) during incubation in water. However,  
215 there were sub-groups of genes that were induced (blue) during incubation in water (Fig. 7, Sup

216 Fig. 1-4). Four clusters of induced genes were identified: Cluster A, containing genes that were  
217 found to be induced very late, around one month in water; Cluster B, genes that were induced  
218 throughout the time course; Cluster C, genes that were induced at early time points and then  
219 repressed in later time points; and Cluster D, genes that were expressed late (close to one month  
220 in water) (Sup. Fig. 1-4).

221 Some of the repressed genes were identified as those involved in DNA replication. Genes  
222 such as *holB* and *sss*, encoding for DNA polymerase III and a site-specific recombinase, were  
223 induced early on, but then repressed for the remainder of the experiment, indicating that DNA  
224 replication slows over time in water. Other DNA replication genes such as *recQ* and *ruvA*, were  
225 repressed in water as well. However, the *sbc* genes (*sbcB* and *sbcD*), which encode for  
226 exonucleases (DNases) were induced in water. Genes encoding for proteins responsible for  
227 mismatch repair (*micA*) and those involved in nucleotide excision repair (*uvr*) were induced. In  
228 addition, *polA*, the gene encoding for DNA polymerase I, which has an exonuclease activity (3'-  
229 5' and 5'-3') required for excision repair was induced in water as were DNA binding proteins  
230 PA3940 and PA4704 (*cbpA*), and integration host factor *himA*. These results suggest that DNA  
231 repair and nucleoid condensation may occur to protect the DNA in unfavorable conditions.  
232 Induction of nucleoid-associated proteins (NAPs) such as *cbpA* and *himA* correlates with the  
233 increased fluorescence observed in PicoGreen® staining.

234 Many metabolic genes were repressed in water, which is consistent with the reduction in  
235 ATP production over time (Table 1), but some genes were induced that indicate a shift to utilizing  
236 alternate sources of energy to persist. Genes required for fatty-acid oxidation and involved in fatty-  
237 acid and phospholipid metabolism (*foaB*, *fadH1*, *fadH2*) were induced very late and may explain  
238 the utilization of the phospholipid membrane for energy and the reduction in cell size after one

239 month in water. Many amino acid uptake (PA4911, PA4072, *oprD*) and catabolism genes (*pepA*,  
240 *aruB*, *phhC*, *amaB*, *gcdH*, *ilvD*) were also induced, pointing to increased uptake and degradation  
241 of amino acids as a source of nutrients, possibly from the subset of dying cells in the population.  
242 Other expressed genes (*exaA*, *zdhB*), responsible for the utilization of alternative energy sources  
243 (alcohols, xanthine, purines, pyrimidines, pterins, and aldehyde substrates) were up-regulated as  
244 well.

245 Genes that were consistently expressed or induced over two months in water were those  
246 that may be involved in maintaining the electrochemical gradient, or proton-motive force (PMF)  
247 of the membrane (*cycH*, *cyoB*, *cyoC*, and *ccpR*), a number of transport and efflux-related genes  
248 (*oprD*, *spuF*, *mexD*, PA0397, PA0450, PA4126, PA3840), many transcriptional regulators  
249 (PA0163, PA3782, PA5179, PA0272, *dnr*), and genes encoding for sensor/response regulators  
250 (*retS*, *phoB*, *pilS*, PA4293). The expression patterns of these genes demonstrates a requirement  
251 for PAO1 in nutrient depleted conditions to maintain the PMF in order for the organism to  
252 synthesize minimal amounts of ATP by using alternative energy sources, to preserve essential cell  
253 components, transport substrates, and respond to the environment, all through coordinated  
254 transcriptional control of cellular processes. The presence of a constant PMF was also observed  
255 in flow cytometry experiments using Redox Sensor Green, a cell viability stain based on the  
256 presence of membrane potential, as PAO1 cells were successfully stained after 6 days in water  
257 (data not shown).

258 There were a number of genes of interest that had notable gene expression patterns in water  
259 over time, suggesting a specific role in persistence. Genes associated with adaptation and  
260 protection such as *inaA*, and *cyaA* were both induced early on in water and then repressed at later

261 time points. Flagella genes (*flgJ*, *fliM*, *flgK*, *flhA*, *fliC*) were induced at later time points, as were  
262 the type VI secretion genes (*tseI*, *vgrG*).

263 Supplemental Table 1 lists the identity of each gene, the raw expression (CPS) and fold  
264 change in gene expression at every time point relative to time zero. The global pattern of gene  
265 repression suggests that many cellular processes are turned off during prolonged incubation in  
266 water, however some genes were found to be induced at particular time points or at much later  
267 time points, possibly indicating a specific role in water survival and a highly coordinated response.

### 268 ***P. aeruginosa* alters the phospholipid composition of its membrane when dormant.**

269 The longer *P. aeruginosa* remained in water, viability increased, and the outer membrane  
270 became more impermeable to the hydrophobic dye NPN and more tolerant to polymyxin B. To  
271 further test the hypothesis that the membrane undergoes changes during incubation in water, we  
272 analyzed the total phospholipid content of cells in water. Thin layer chromatography (TLC) was  
273 used to separate the total lipid extracts from PAO1, following incubation in water. Cells were  
274 incubated in water as described above and samples were taken at day 0, day 7, and day 14 and run  
275 on a TLC plate with lipids extracted from control cells grown in low and high phosphate  
276 concentrations. In the presence of limiting phosphate, *P. aeruginosa* produces a unique ornithine  
277 lipid that lacks phosphate in the head group, as a mechanism of adapting to limiting phosphate  
278 [15], as a substitute for the primary lipid in the PAO1 envelope, phosphatidylethanolamine. PAO1  
279 produced a novel lipid species following incubation in water for 14 days, which was not ornithine  
280 lipid, indicating that *P. aeruginosa* produces a different membrane phospholipid content during  
281 incubation in water (Fig. 6).

282

## 283 DISCUSSION

284 *Pseudomonas aeruginosa* is capable of long-term survival without nutrients by existing in a  
285 dormant state. Despite staining with propidium iodide, cells sorted by FACS analysis were plated  
286 on LB agar and found to 100% viable within 4 weeks (Fig. 2, Table 1). The cell-impermeable  
287 DNA stain propidium iodide (PI) was originally thought of as a stain for dead cells, but in  
288 agreement with other findings [18], we demonstrate here that PI-stained cells can be sorted and  
289 recovered as viable growing colonies. PI is therefore better described as an indicator of membrane  
290 damage, rather than bacterial death. During long-term survival in water, *P. aeruginosa* displayed  
291 several adaptations that are consistent with dormancy. Cells in water had decreased metabolic  
292 activity, as determined by measuring ATP production and by a general repression trend in the gene  
293 expression patterns of a large number of transcriptional *lux* fusions. Cell shape converted from a  
294 rod to a coccoid shape, the phospholipid content changed, and the outer membrane demonstrated  
295 a decreased permeability and increased tolerance to polymyxin B disruption.

296 Although the majority of PAO1 genes were suppressed in water, a number of genes were  
297 found to maintain or have induced expression at some point in the time course of long-term  
298 survival in water. Since we were unable to recover single transposon mutants that died during long-  
299 term incubation in water, it appears that the adaptation to surviving in water is complex and  
300 involves more than a single gene. Given the substantial proportion of induced genes, there does  
301 appear to be an active and complex process of differentiation. It may be that multiple genes  
302 contribute to survival in water and therefore it is unlikely to identify single mutants with survival  
303 defects. The mutant library used here is not a saturating collection of mutants, and the mutants of  
304 interest may not be present in this library [16,20]. Future experiments will employ other genome-



305 wide methods to attempt to identify a specific mechanism and genes required for long-term  
306 survival in water.

307         The gene expression profile of *P. aeruginosa* in water validates a coordinated response by  
308 the organism in the transition to dormancy. Most of the genes were repressed over time indicating  
309 a reduction in many cellular and metabolic processes, but a number of specific genes were induced  
310 throughout, or at certain time points, suggesting an importance for these genes in survival and  
311 maintenance of a dormant state. Amino acid, fatty acid, and phospholipid metabolism genes were  
312 induced and these compounds likely become alternative energy sources in the absence of nutrients  
313 [21]. It has been shown that growth-arrested bacteria utilize membrane phospholipids as an  
314 alternative energy source, which leads to a reduction in cell size and volume and promotes  
315 transport of substrates [9]. This has been noted in both *E. coli* and *Vibrio cholerae* [22,23]. The  
316 cell size of *P. aeruginosa* significantly decreased over time in water (Fig. 3), and we also observed  
317 an increase in expression of a number of transport genes (Sup Table 1).

318         Genes in the library required for DNA replication were repressed over time, but those  
319 involved in DNA repair and DNA packaging were induced. It is likely that DNA repair and  
320 packaging are needed to ensure that DNA is protected and the fidelity of DNA is maintained until  
321 the cell is in more favorable conditions for replication. The induction of genes encoding for  
322 nucleoid-associated proteins (NAPs) such as CpbA and HimA, involved in nucleoid condensation  
323 in other species, was notable as this correlates with the observed increase in fluorescence of PAO1  
324 in water over time stained with the dsDNA dye PicoGreen® (Fig. 4). *E. coli* in stationary phase  
325 has been shown to possess a condensed nucleoid due to NAPs, which is thought to protect against  
326 DNA damage and confer a survival advantage [9,24].

327 Gene expression results also indicated that genes involved in maintenance of the proton-  
328 motive force (PMF), efflux pumps, sensor-response regulators, and other transcriptional regulators  
329 were required for *P. aeruginosa* in water. Maintenance of the PMF is very likely necessary to  
330 allow the organism to make ATP using alternative energy sources, transport substrates, support  
331 motility, and respond to the environment [9]. It has been shown that bacteria in growth arrest need  
332 to preserve the PMF to enable these functions in addition to maintaining the essential  
333 macromolecular components of the cell [25,26]. Many flagellin genes were also induced in water,  
334 indicating that flagella are needed for biofilm formation, and possibly for chemotaxis to a nutrient  
335 source [27,28]. Large aggregates, likely biofilms, were observed by microscopy and detected in  
336 flow cytometry in PAO1 after 2 months in water (data not shown).

337 Genes involved in adaptation and protection were induced early on in water. The role of  
338 these genes will be investigated in future studies. Type VI secretion genes were significantly  
339 induced after one month in water and they may be needed for a competitive or protective  
340 advantage, as well as biofilm formation (*tseI*), but further studies will be required to determine the  
341 role of the type VI secretion system in dormancy [29,30]. The differential expression of PAO1  
342 genes in water using the mini-Tn5-*lux* library provides significant insight into the complexity of  
343 the response of the organism to this environment and points to a number of potential mechanisms  
344 required for survival in water.

345 Non-sporulating bacteria undergo a reversible state of low metabolic activity without  
346 replication to persist in unfavorable environmental conditions [31,11]. Previous studies have  
347 indicated that other non-spore forming bacteria such as *E. coli* and *Klebsiella pneumoniae* are  
348 capable of dormancy under environmental stress and that this is a reversible phenomenon [32].  
349 Dormancy in *Mycobacterium tuberculosis* has been well documented [33]. Dormant cells have

350 also been referred to as persister cells because they are able to resist the effects of antibiotics [34].  
351 Although traditionally persister cells and dormancy have been considered to be separate  
352 phenomena, because persister cells result after exposure to high doses of antibiotics, studies have  
353 shown that dormancy may be the best model for persister cells [35,36]. Aside from exposure to  
354 antibiotics, other inducers of persistence or dormancy in bacteria may be stress or starvation  
355 responses [37-40]. In general, some mediators of persistence in bacteria have been shown to be  
356 the SOS response genes, TisB toxin, the RelA protein, and the HipB toxin [37,48]. In addition,  
357 high persister cells (hip) are often found within a biofilm [37]. Bacterial persistence is a major  
358 issue when dealing with infectious diseases as these cells are resistant to antibiotics [34]. The  
359 phenomenon of dormancy and persistence has been investigated in *P. aeruginosa*, primarily in  
360 terms of antibiotic resistance, biofilm formation, and resistance to chemicals [37,42,43] and some  
361 novel persister genes have been identified [44].

362         Similar to our results, *Vibrio cholerae* has been shown to shift to a persister phenotype in  
363 water [45]. When *V. cholerae* was introduced into filter-sterilized lake water the cells displayed  
364 characteristics of persister cells and were culturable for >700 days. Interestingly, these authors also  
365 observed that the cells became smaller and formed aggregates over time in water, similar to what  
366 was observed in this study. The authors concluded that nutrient stress can induce a persister  
367 phenotype in *V. cholerae* in environmental reservoirs, which results in epidemics of the disease  
368 when nutrients such as phosphate become more available in the environment. We are interested in  
369 determining the nutrient threshold required to revert persister cells in *P. aeruginosa* to vegetative  
370 cells.

371         *P. aeruginosa* can also be considered a model organism for the study of diverse bacterial  
372 mechanisms that contribute to bacterial persistence. The ability of *P. aeruginosa* to survive long

373 term in water, and to be recovered from drains, sinks, and water pipes, makes it a reservoir for  
374 infectious disease. Since this organism is readily transferred into the hospital where it causes  
375 infection, it is important to understand how this organism survives. This will contribute to solutions  
376 for the prevention of infection. Finally, determining the mechanism for survival in water will be  
377 beneficial for understanding how other microorganisms may persist in similar conditions.

378 **ACKNOWLEDGEMENTS**

379 This work was funded by the Athabasca University Academic Research Fund. Shawn Lewenza  
380 held the Westaim-ASRA Chair in Biofilm Research. We would like to thank Dr. Richard Moore  
381 for insights into water survival experiments and assisting with experimentation.

382

383 **REFERENCES**

- 384 1. Jorgensen F, Bally M, Chapon-Herve V, Michel G, Lazdunski A, Williams P, Stewart  
385 GS. 1999. RpoS-dependant stress tolerance in *Pseudomonas aeruginosa*. Microbiol.  
386 1999;145;835-844. pmid:10220163  
387
- 388 2. Wolfgang MC, Kulasekara BR, Liang X, Boyd D, Wu K, Yang Q, et al. Conservation of  
389 genome content and virulence determinants among clinical and environmental isolates of  
390 *Pseudomonas aeruginosa*. PNAS. 2003;100(14);8484-8489. pmid:12815109  
391
- 392 3. Driscoll JA, Brody SL, Kollef MH. The epidemiology, pathogenesis and treatment of  
393 *Pseudomonas aeruginosa* infections. Drugs. 2007;67(3);351-368. pmid:17335295  
394
- 395 4. Kramer A, Schwebke I, Kampf G. How long do nosocomial pathogens persist on  
396 inanimate surfaces? A systematic review. BMC Infectious Dis. 2006;6;130.  
397 pmid:16914034  
398
- 399 5. Moore RA, Tuanyok A, Woods DE. Survival of *Burkholderia pseudomallei* in water.  
400 BMC Res Notes. 2008;1;11.  
401
- 402 6. Hemme CL, Tu Q, Shi Z, Qin Y, Gao W, Deng Y, et al. Comparative metagenomics  
403 reveals impact of contaminants on groundwater microbiomes. Front Microbiol.  
404 2015;6;1205. pmid:26583008  
405
- 406 7. Trautmann M, Lepper PM, Haller M. Ecology of *Pseudomonas aeruginosa* in the  
407 intensive care unit and the evolving role of water outlets as a reservoir of the organism.  
408 Am J Infect Control 2005;33(5Suppl.1);S41-49. pmid:15940115  
409
- 410 8. Aumeran C, Paillard C, Robin F, Kanold J, Baud O, Bonnet R. *Pseudomonas aeruginosa*  
411 and *Pseudomonas putida* outbreak associated with contaminated water outlets in an  
412 oncohaematology paediatric unit. J Hosp Infect. 2007;65(1);47-53. pmid:17141370  
413
- 414 9. Bergkessel M, Basta DW, Newman DK. The physiology of growth arrest: uniting  
415 molecular and environmental microbiology. Nat Rev Microbiol. 2016;14(9);549-562.  
416
- 417 10. Lewis K. Persister cells, dormancy and infectious disease. Nat Rev Microbiol.  
418 2007;5(1);48-56. pmid:17143318  
419
- 420 11. Lennon JT, Jones SE. Microbial seed banks: the ecological and evolutionary implications  
421 of dormancy. Nat Rev Microbiol. 2011;9(2);119-130. pmid:21233850  
422
- 423 12. Gefen O, Fridman O, Ronin I, Balaban NQ. Direct observation of single stationary-phase  
424 bacteria reveals a surprisingly long period of constant protein production activity. PNAS.  
425 2014;111(1);556-561. pmid:24344288  
426

- 427 **13.** Lo B, Grant C, Hancock RE. Use of the fluorescent probe 1-N-phenyl-naphthylamine to  
428 study the interactions of aminoglycoside antibiotics with the outer membrane of  
429 *Pseudomonas aeruginosa*. *Antimicrob. Agents Chemother.* 1984;26(4);546-551.  
430 pmid:6440475  
431
- 432 **14.** Johnson L, Mulcahy H, Kanevets U, Shi Y, Lewenza S. Surface-localized spermidine  
433 protects the *Pseudomonas aeruginosa* outer membrane from antibiotic treatment and  
434 oxidative stress. *J Bacteriol.* 2012;194(4);813-826. pmid:22155771  
435
- 436 **15.** Lewenza S, Falsafi R, Bains M, Rohs P, Stupak J, Sprott GD, et al. The *olsA* gene  
437 mediates the synthesis of an ornithine lipid in *Pseudomonas aeruginosa* during growth  
438 under phosphate-limiting conditions, but is not involved in antimicrobial peptide  
439 susceptibility. *FEMS Microbiol Lett.* 2011;320(2);95-102. pmid:21535098  
440
- 441 **16.** Lewenza, S, Falsafi RK, Winsor G, Gooderham WJ, McPhee JB, Brinkman FS, et al.  
442 Construction of a mini-Tn5-*luxCDABE* mutant library in *Pseudomonas aeruginosa*  
443 PAO1: a tool for identifying differentially regulated genes. *Genome Res.* 2005;15;583-  
444 589. pmid:15805499  
445
- 446 **17.** Winsor GL, Griffiths EJ, Lo R, Dhillon BK, Shay JA, Brinkman FS. Enhanced  
447 annotations and features for comparing thousands of *Pseudomonas* genomes in the  
448 *Pseudomonas* genome database. *Nucleic Acids Res.* 2016;44(D1);D646-653.  
449 pmid:26578582  
450
- 451 **18.** Shi L, Günther S, Hübschmann T, Wick LY, Harms H, Müller S. Limits of propidium  
452 iodide as a cell viability indicator for environmental bacteria. *Cytometry A.*  
453 2007;71(8);592-598. pmid:17421025  
454
- 455 **19.** Halverson TW, Wilton M, Poon KK, Petri B, Lewenza S. DNA is an antimicrobial  
456 component of neutrophil extracellular traps. *PLoS Pathog.* 2015;11(1); e1004593.  
457 pmid:25590621  
458
- 459 **20.** Stover CK, Pham XQ, Erwin AL, Mizoguchi AD, Warrenner P, Hickey MJ, et al.  
460 Complete genome sequence of *Pseudomonas aeruginosa* PAO1, an opportunistic  
461 pathogen. *Nature.* 2000;406(6799);959-964. pmid:10984043  
462
- 463 **21.** Daniel J, Deb C, Dubey VS, Sirakova TD, Abomoelak B, Morbidoni HR, et al. Induction  
464 of a novel class of diacylglycerol acyltransferases and triacylglycerol accumulation in  
465 *Mycobacterium tuberculosis* as it goes into a dormancy-like state in culture. *J Bacteriol.*  
466 2004;186(15);5017-5030. pmid:15262939  
467
- 468 **22.** Farewell A, Diez AA, DiRusso CD, Nystrom T. Role of the *Escherichia coli* FadR  
469 regulator in stasis survival and growth phase-dependent expression of the *uspA*, *fad*, and  
470 *fab* genes. *J Bacteriol.* 1996;178(22);6443-6450. pmid:8932299  
471

- 472 **23.** Hood MA, Guckert JB, White DC, Deck F. Effect of nutrient deprivation on lipid,  
473 carbohydrate, DNA, RNA, and protein levels in *Vibrio cholerae*. Appl Environ  
474 Microbiol. 1986;52;788-793. pmid:2430523  
475
- 476 **24.** Wolf SG, Frenkiel D, Arad T, Finkel SE, Kolter R, Minsky A. DNA protection by stress-  
477 induced biocrystallization. Nature. 1999;400(6739);83-85. pmid:10403254  
478
- 479 **25.** Koch AL. Microbial physiology and ecology of slow growth. Microbiol Mol Biol Rev.  
480 1997;61;305-318. pmid:9293184  
481
- 482 **26.** Nystrom T, Gustavsson N. Maintenance energy requirement: what is required for stasis  
483 survival of *Escherichia coli*? Biochim Biophys Acta. 1998;1365;225-231.  
484
- 485 **27.** Geesy GG, Morita RY. Capture of arginine at low concentrations by a marine  
486 psychrophilic bacterium. Appl Environ Microbiol. 1979;38;1092-1097. pmid:16345475  
487
- 488 **28.** Klausen M, Heydorn A, Ragas P, Lambertsen L, Aaes-Jorgensen A, Molin S et al.  
489 Biofilm formation by *Pseudomonas aeruginosa* wild type, flagella, and type IV pili  
490 mutants. Mol Microbiol. 2003;48(6);1511-1524. pmid:12791135  
491
- 492 **29.** Mougous JD, Cuff ME, Raunser S, Shen A, Zhou M, Gifford CA, et al. A virulence locus  
493 of *Pseudomonas aeruginosa* encodes a protein secretion apparatus. Science.  
494 2006;312(5779);1526-1530. pmid:16763151  
495
- 496 **30.** Southey-Pillig CJ, Davies DG, Sauer K. Characterization of temporal protein production  
497 in *Pseudomonas aeruginosa* biofilms. J Bacteriol. 2005;187(23);8114-8126.  
498 pmid:16291684  
499
- 500 **31.** Kaprelyants AS, Gottschal JC, Kell, DB. Dormancy in non-sporulating bacteria. FEMS  
501 Microbiol Rev. 1993;10(3-4);271-285. pmid:8318260  
502
- 503 **32.** Sachidanandham R, Yew-Hoong Gin K. A dormancy state in nonspore-forming bacteria.  
504 Appl Microbiol Biotechnol. 2009;81;927-941. pmid:18815783  
505
- 506 **33.** Boon C, Dick T. How *Mycobacterium tuberculosis* goes to sleep: the dormancy survival  
507 regulator DosR a decade later. Future Microbiol. 2012;7(4);513-518. pmid:22439727  
508
- 509 **34.** Rotem E, Loinger A, Ronin I, Levin-Reisman I, Gabay C, Shoresh N, et al. Regulation of  
510 phenotypic variability by a threshold-based mechanism underlies bacterial persistence.  
511 PNAS. 2010;107(28);12541-12546. pmid:20616060  
512
- 513 **35.** Wood TK, Knabel SJ, Kwan BW. Bacterial persister cell formation and dormancy. Appl  
514 Environ Microbiol. 2013;79(23);7116-7121. pmid:24038684  
515



- 516       **36.** Kell D, Potgieter M, Pretorius E. Individuality, phenotypic differentiation, dormancy and  
517       ‘persistence’ in culturable bacterial systems: commonalities shared by environmental,  
518       laboratory, and clinical microbiology. *F1000 Res.* 2015;4;179. pmid:26629334  
519
- 520       **37.** Lewis K. Persister cells. *Annu Rev Microbiol.* 2010;64;357-372. pmid:20528688  
521
- 522       **38.** Fung DKC, Chan EWC, Chin ML, Chan RCY. Delineation of a bacterial starvation stress  
523       response network which can mediate antibiotic tolerance development. *Antimicrob*  
524       *Agents Chemother.* 2010;54(3);1082-1093. pmid:20086164  
525
- 526       **39.** Murakami K, Ono T, Viducic D, Kayama S, Mori M, Hirota K, et al. Role for the *rpoS*  
527       gene of *Pseudomonas aeruginosa* in antibiotic tolerance. *FEMS Microbiol Lett.*  
528       2005;242;161-167. pmid:15621433  
529
- 530       **40.** Viducic D, Ono T, Murakami K, Susilowati H, Kayama S, Hirota K, et al. Functional  
531       analysis of *spot*, *relA*, and *dkxA* genes on quinolone tolerance in *Pseudomonas*  
532       *aeruginosa* under nongrowing condition. *Microbiol Immunol.* 2006;50;349-357.  
533       pmid:16625057  
534
- 535       **41.** Lewis K. Multidrug tolerance of biofilms and persister cells. *Curr Top Microbiol*  
536       *Immunol.* 2008;322;107-131. pmid:18453274  
537
- 538       **42.** Harrison JJ, Turner RJ, Ceri H. Persister cells, the biofilm matrix and tolerance to metal  
539       cations in biofilm and planktonic *Pseudomonas aeruginosa*. *Environ Microbiol.*  
540       2005;7(7);981-994. pmid:15946294  
541
- 542       **43.** Kim J, Hahn JS, Franklin MJ, Stewart PS, Yoon J. Tolerance of dormant and active cells  
543       in *Pseudomonas aeruginosa* PAO1 biofilm to antimicrobial agents. *J Antimicrob*  
544       *Chemother.* 2009;63(1);129-135. pmid:19001451  
545
- 546       **44.** De Groote VN, Verstraeten N, Fauvart M, Kint CI, Verbeeck AM, Beullens S, et al.  
547       Novel persistence genes in *Pseudomonas aeruginosa* identified by high-throughput  
548       screening. *FEMS Microbiol Lett.* 2009;297;73-79. pmid:19508279  
549
- 550       **45.** Jubair M, Morris JG Jr, Ali A. Survival of *Vibrio cholerae* in nutrient-poor environments  
551       is associated with a novel “persister” phenotype. *PLoS ONE.* 2012;7(9); e45187.  
552       pmid:23028836  
553

554  
555

556

557 **TABLES**

558 **Table 1. The percentage of viable, propidium iodide-stained and overall ATP production of**  
559 ***P. aeruginosa* PAO1 in water.**

| <b>Time (weeks)</b> | <b>% Viable cells<sup>a</sup></b> | <b>ATP production (cps)<sup>b</sup></b> |
|---------------------|-----------------------------------|-----------------------------------------|
| 1                   | 56.7                              | 32161                                   |
| 4                   | 100                               | 1460                                    |
| 6                   | 100                               | 1334                                    |
| 8                   | 100                               | 1092                                    |

560 <sup>a</sup> Cells were FACS sorted that were dual positive for SYTO9 and PI, and plated for direct

561 bacterial counts. <sup>b</sup> Cells ( $10^7$  CFU in water) were incubated for 5 minutes at room temperature at

562 a 1:1 ratio with BacTiter-Glo™ reagent (1 ml final volume) and luminescence as a measurement

563 of ATP production was determined.

564 **FIGURE LEGENDS**

565 **Figure 1.** Survival of *P. aeruginosa* PAO1 incubated in water. Overnight cultures of PAO1 and  
566 mutants were washed thoroughly and inoculated into sterile water at a concentration of  $10^7$   
567 CFU/ml and incubated at room temperature. At each time point, aliquots were removed and plated  
568 on LB for direct bacterial counts. Each colour represents one of four trials and each value is the  
569 average of at least triplicate samples.

570

571 **Figure 2.** Scatter plots and bar graph representation of the populations of SYTO 9 and propidium  
572 iodide stained *P. aeruginosa* PAO1 in water. Strains were inoculated into sterile water at a  
573 concentration of  $10^7$  CFU/ml and incubated at room temperature. A) Live and dead cell  
574 populations were subjected to LIVE/DEAD® staining every week and quantitated by flow  
575 cytometry. The quadrant labelled S9 refers to the cells that were stained with SYTO9 only, which  
576 are generally considered to be viable. The quadrant labelled S9PI refers to the cells that stained  
577 both with SYTO9 and PI, which are possibly dead or membrane-compromised, dormant cells. The  
578 time points are from day 1, week 1, week 2 and week 4 in water. Each panel represents a population  
579 of 50,000 cells per experiment. B) The percentage of SYTO 9 (green bars) and SYTO9/PI (red  
580 bars) stained cells is depicted over an 8-week time course. The values shown are the average S9  
581 and S9PI counts recovered from triplicate flow cytometry samples. D) The box and whiskers plot  
582 demonstrates the overall proportion of SYTO 9 (green) only staining, compared to SYTO 9 and  
583 PI (red) staining populations of cells in water.

584

585 **Figure 3.** Phase-contrast and fluorescence microscopy of *P. aeruginosa* PAO1 in water. A)

586 Mid-log cells of *P. aeruginosa* under phase contrast. B) *P. aeruginosa* incubated in water for 12  
587 days under phase contrast. C) LIVE/DEAD® staining results of *P. aeruginosa* PAO1 following  
588 incubation in water for 1 and D) 12 weeks. Cells were grown to mid-log in LB, washed, and  
589 added to sdH<sub>2</sub>O at a concentration of 10<sup>7</sup> CFU/ml and incubated at room temperature. Cells were  
590 added to agarose beds on glass slides and visualized on a Leica microscope.

591

592 **Figure 4.** Pico Green staining and flow cytometry analysis of *P. aeruginosa* PAO1 in water. Log  
593 phase cultures of PAO1 were inoculated into water for incubation. Each sample was stained with  
594 Quant-iT™ PicoGreen® and subjected to flow cytometry to analyze the dsDNA content in cells  
595 during long-term incubation in water. Cells from mid-log PAO1 cultures were compared to cells  
596 in water at day 0, 3 weeks and 4 weeks. Each panel represents a population of 50,000 cells per  
597 experiment.

598

599 **Figure 5.** Outer membrane permeability and polymyxin B tolerance of *P. aeruginosa* PAO1  
600 incubated in water. A) The baseline of outer membrane permeability was measured as a function  
601 of 1-N-phenyl-naphthylamine (NPN) uptake and subsequent fluorescence in relative light units  
602 (RLU). Log phase cultures of PAO1 were prepared and inoculated into water for incubation. After  
603 1, 7, 21, and 28 days incubation, cells were treated with sodium azide, an active efflux inhibitor.  
604 B) After NPN addition, polymyxin B was added to disrupt the outer membrane and increase NPN  
605 uptake into the hydrophobic environment of the envelope. The tolerance to polymyxin B treatment  
606 was compared between mid-log LB cultures and cells incubated in water for up to 4 weeks. Values  
607 shown are the average and standard error of triplicate samples.

608

609 **Figure 6.** Ninhydrin detection of amino group containing lipids of PAO1 cells following  
610 incubation in water. Total lipids were extracted, separated by thin layer chromatography, and  
611 sprayed with ninhydrin to visualize the amino group-containing lipids. Lipid samples of water  
612 cultures at day 0, day 7 and day 14 were run on TLC plate, alongside controls of lipids extracted  
613 from cultures grown in BM2-defined media with limiting (400  $\mu$ M) and high phosphate (1.6 mM)  
614 conditions. The positions of the primary membrane lipid phosphatidylethanolamine (PE) and the  
615 unique ornithine lipid (OL) species that is produced under phosphate limitation [15] are indicated.

616

617 **Figure 7.** Cluster analysis of gene expression of *P. aeruginosa* genes in response to water. The  
618 PAO1 mini-Tn5-*luxCDABE* mutant library containing 1369 transcriptional *lux* fusion strains was  
619 inoculated into water in black 96 well microplates and incubated at room temperature. At each  
620 time point the optical density (OD<sub>600</sub>) and luminescence (counts per second) was measured. Gene  
621 expression (CPS) readings were taken at day 0, 0.3, 1, 3, 5, 7, 13, 20, 26, and 34. Luminescence  
622 was divided by absorbance and fold changes were calculated based on the change in expression  
623 (CPS/OD<sub>600</sub>) compared to time 0. Cluster analysis was performed using Tree View and Cluster 3.0  
624 software. Orange indicates repression, and blue indicates induced expression, relative to the time  
625 zero point. Genes with no change in expression are in white. Black bars highlight clusters of genes  
626 that are induced late (A, D), throughout (B) or early (C) in the 34 day time period of incubation in  
627 water.

628

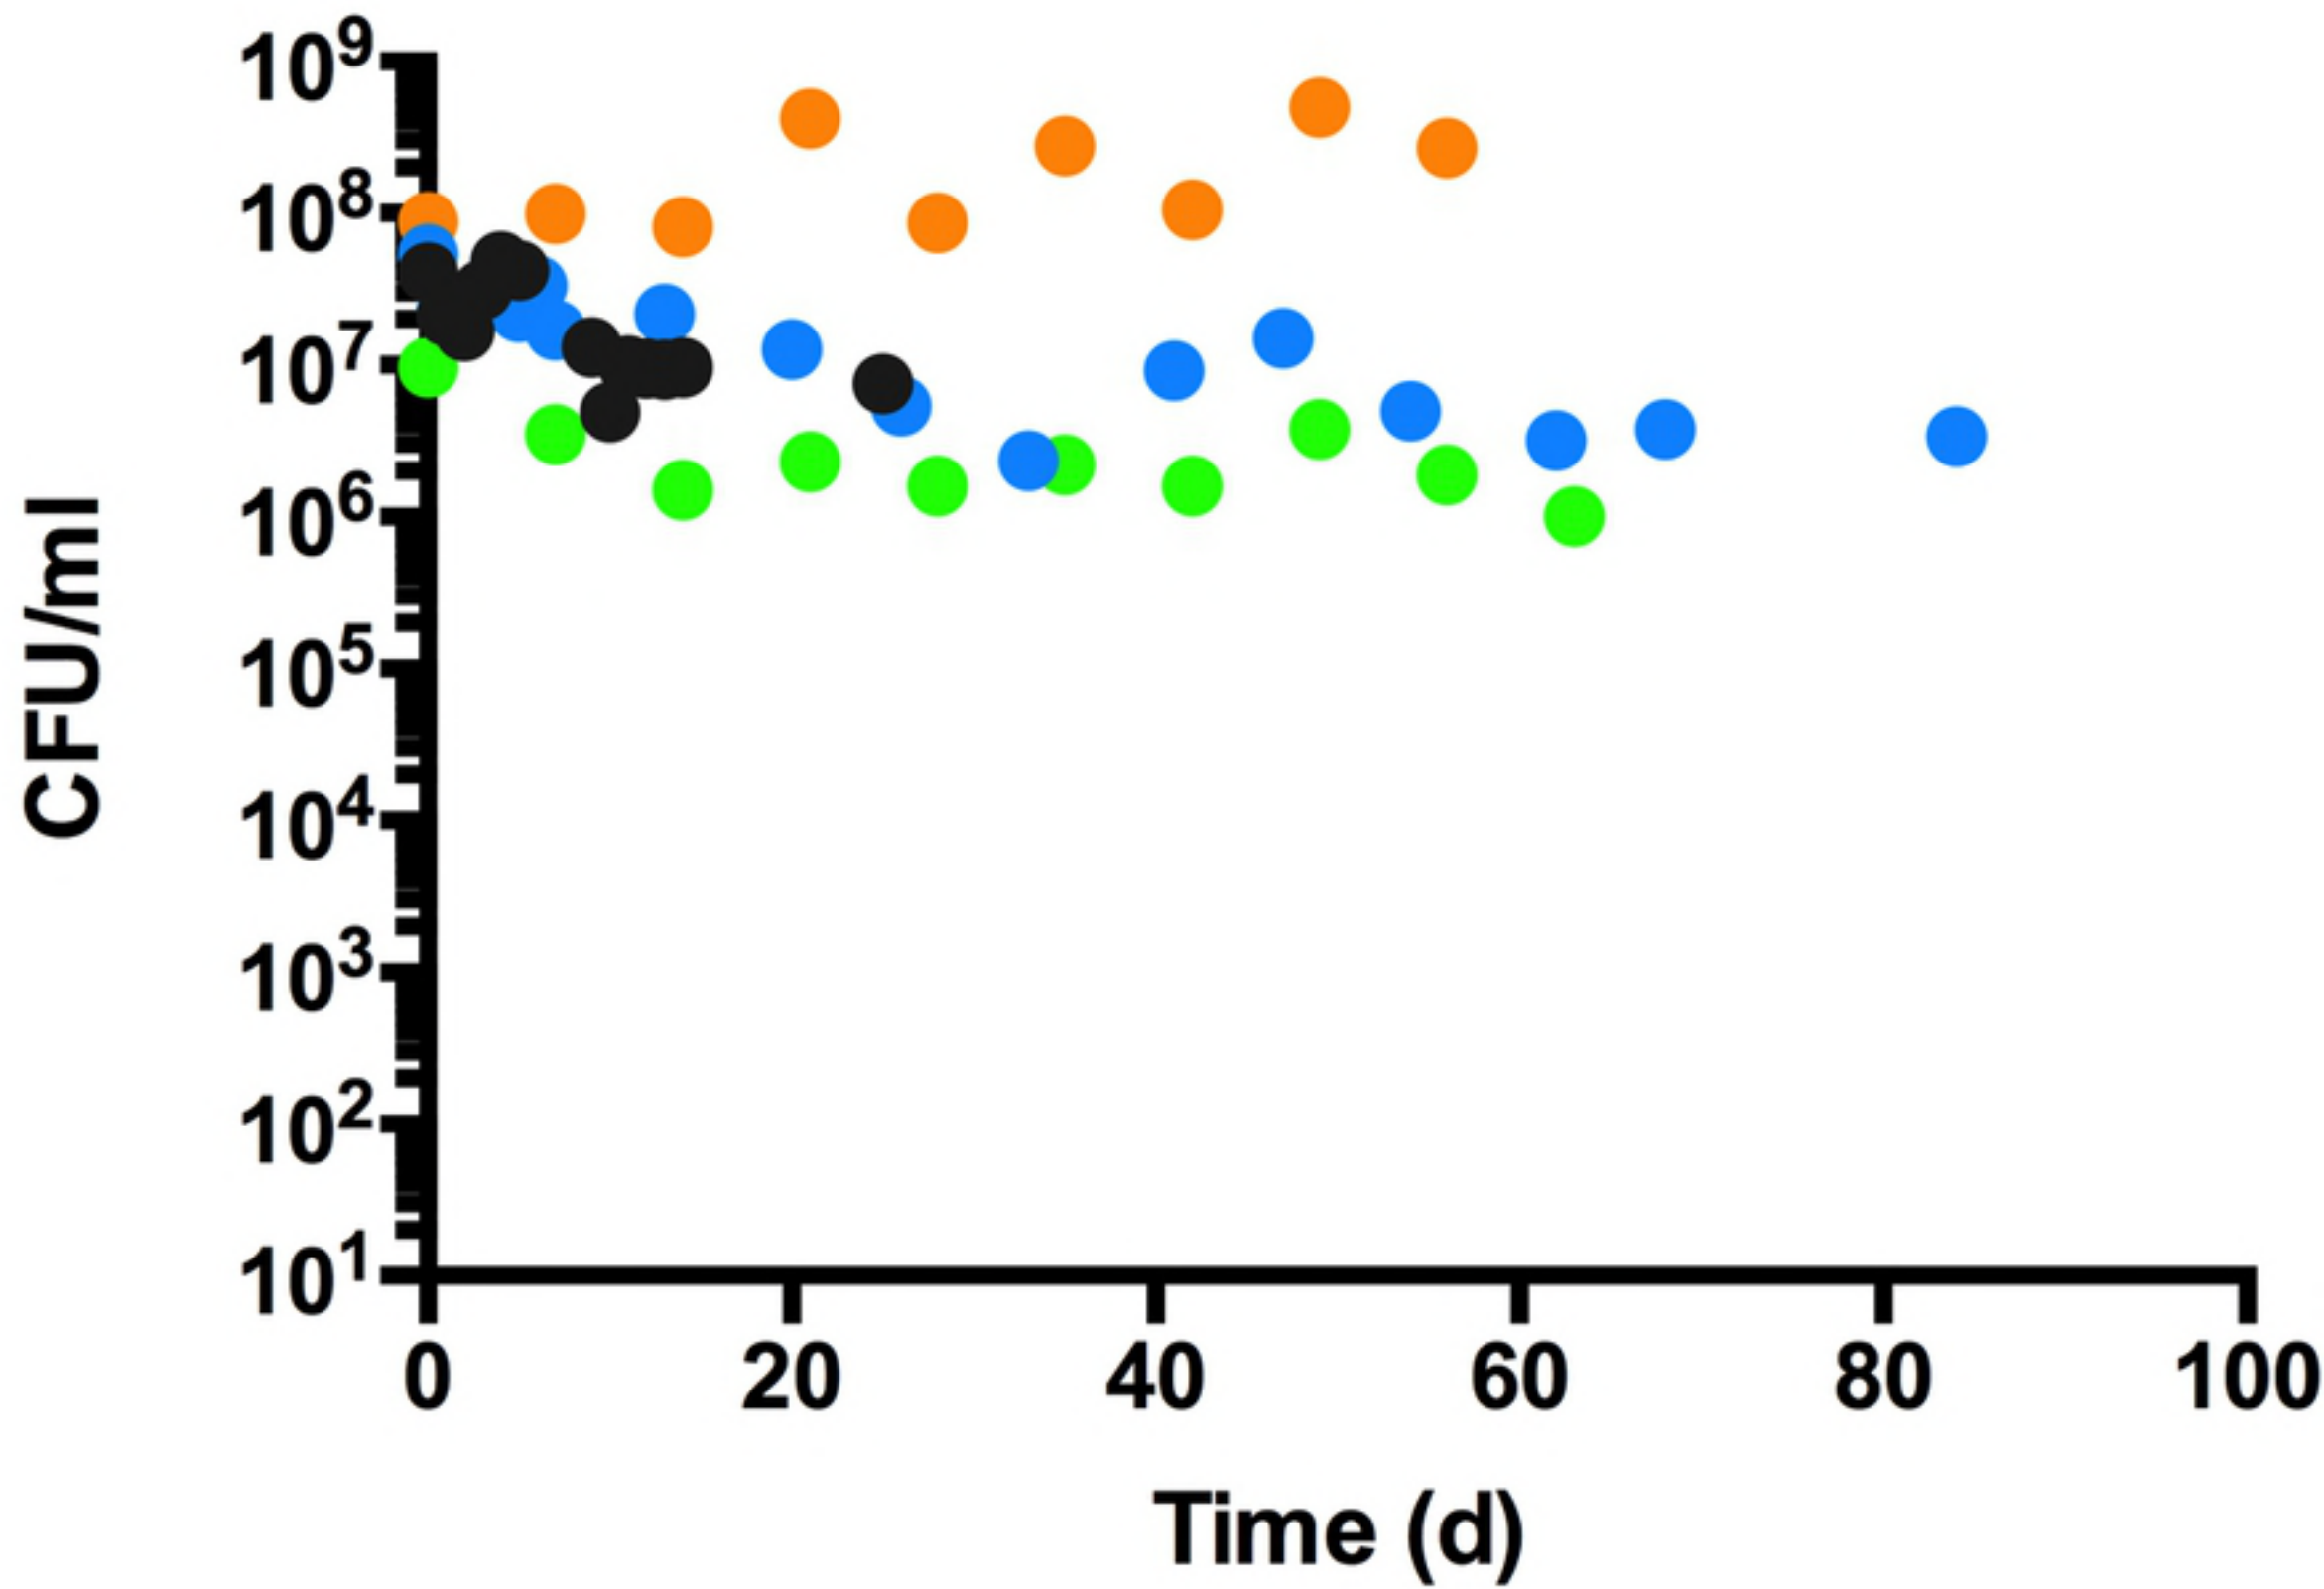

A

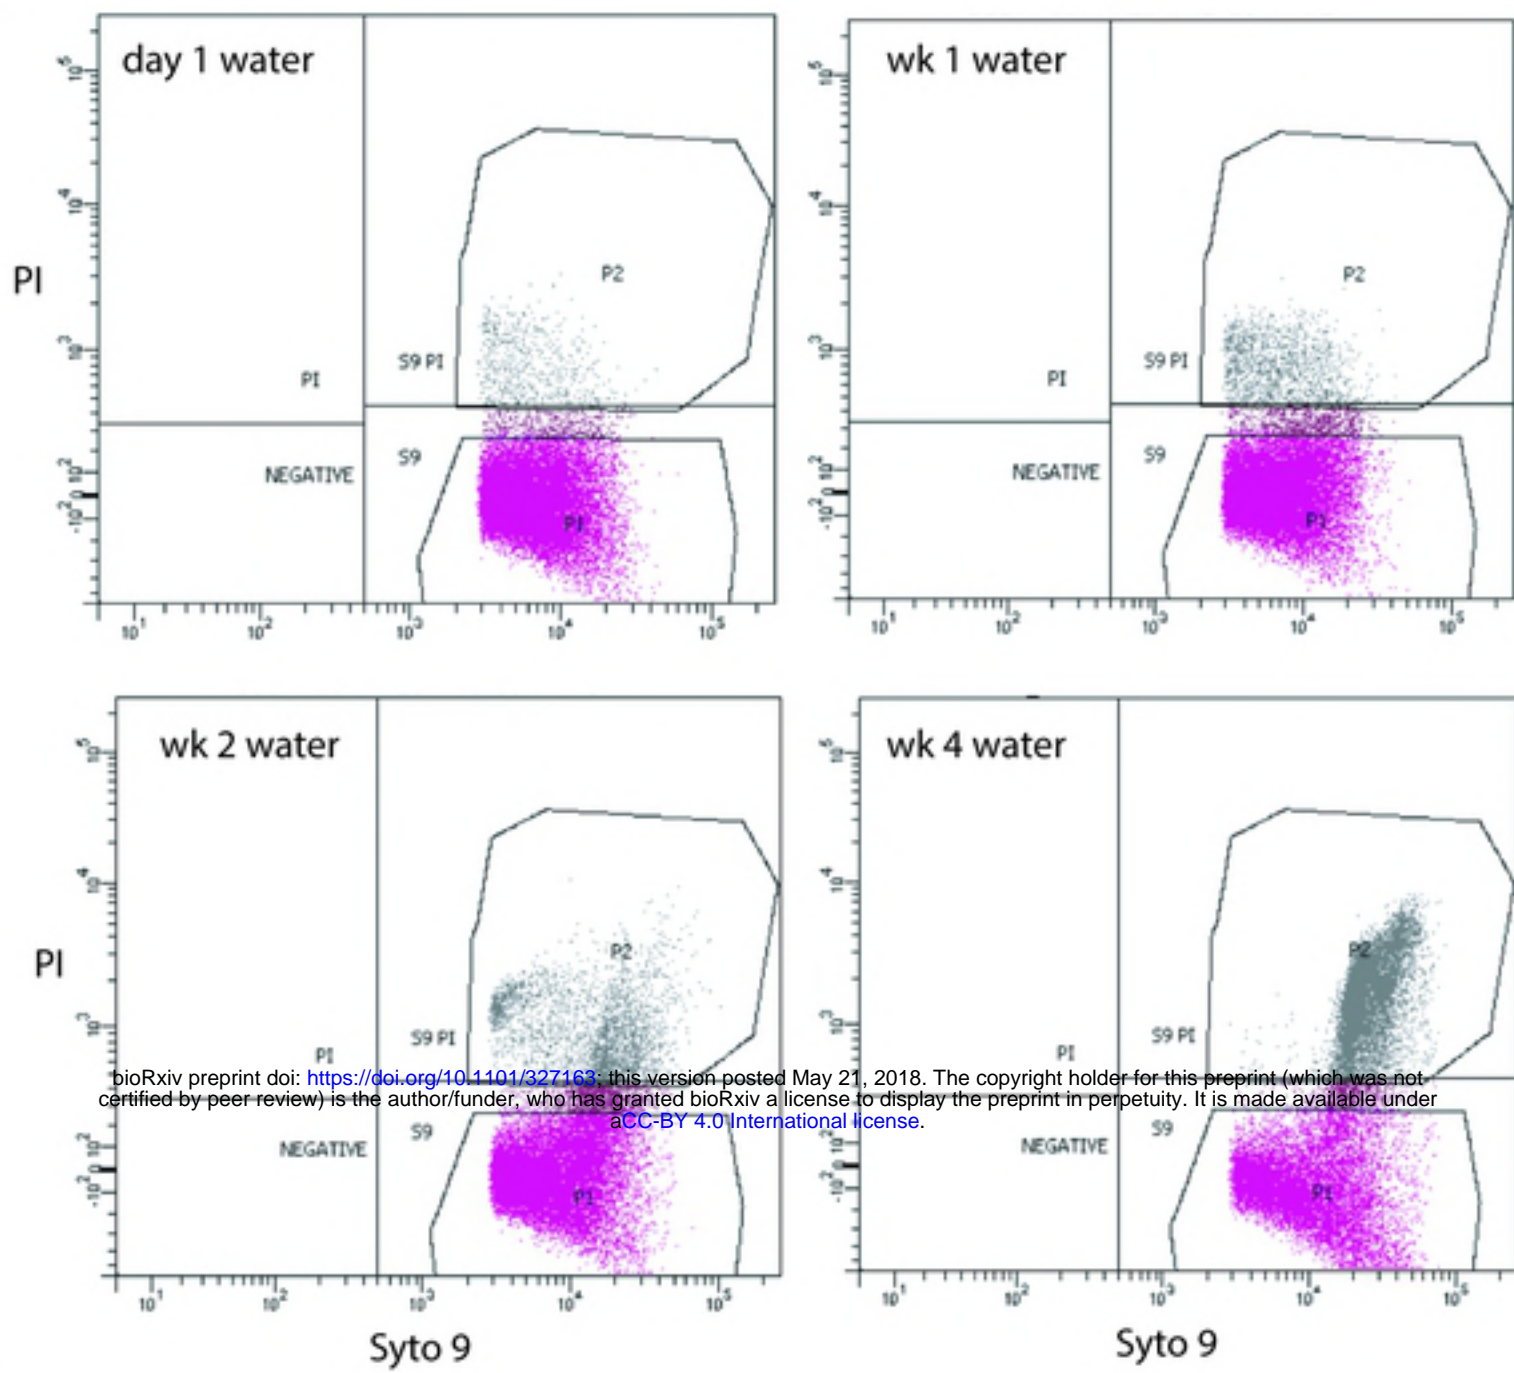

B

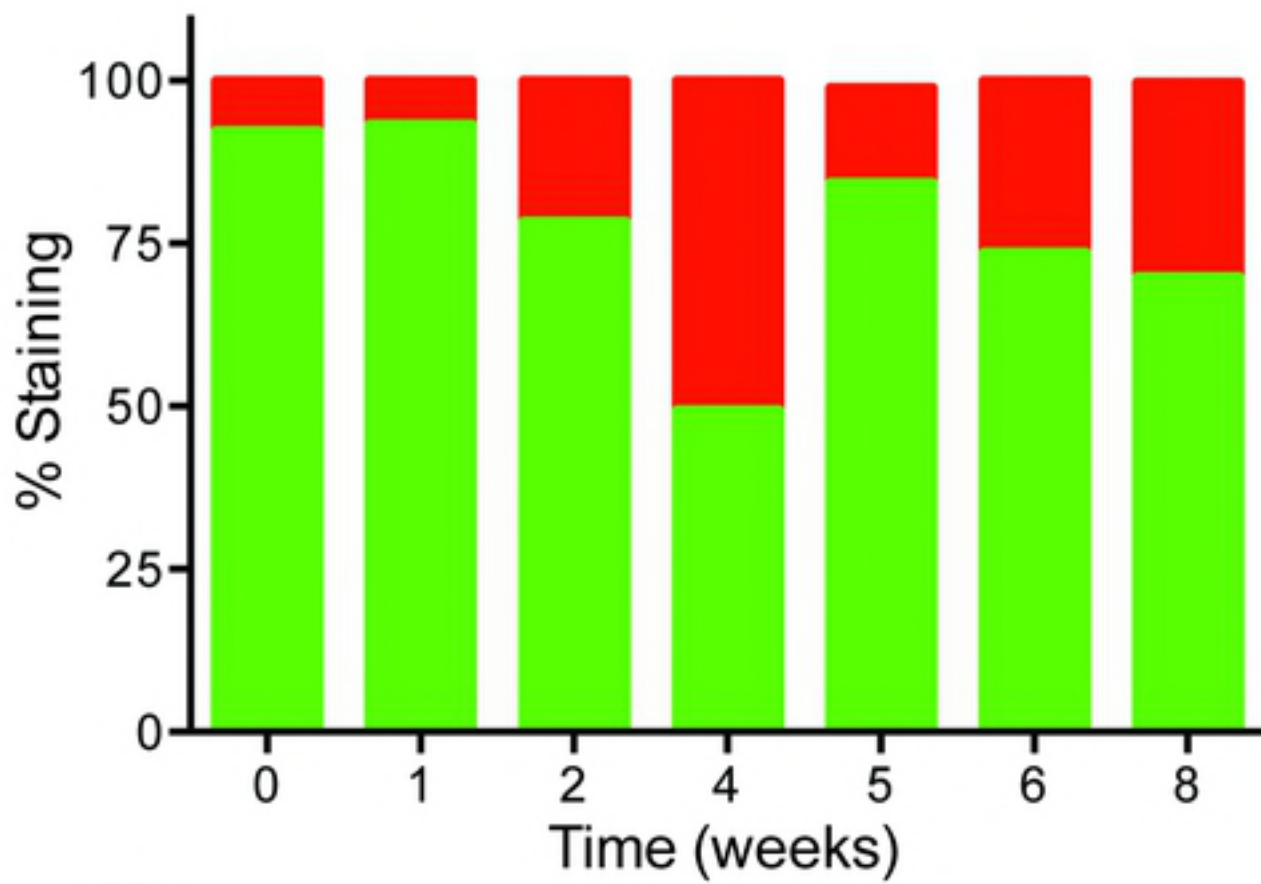

C

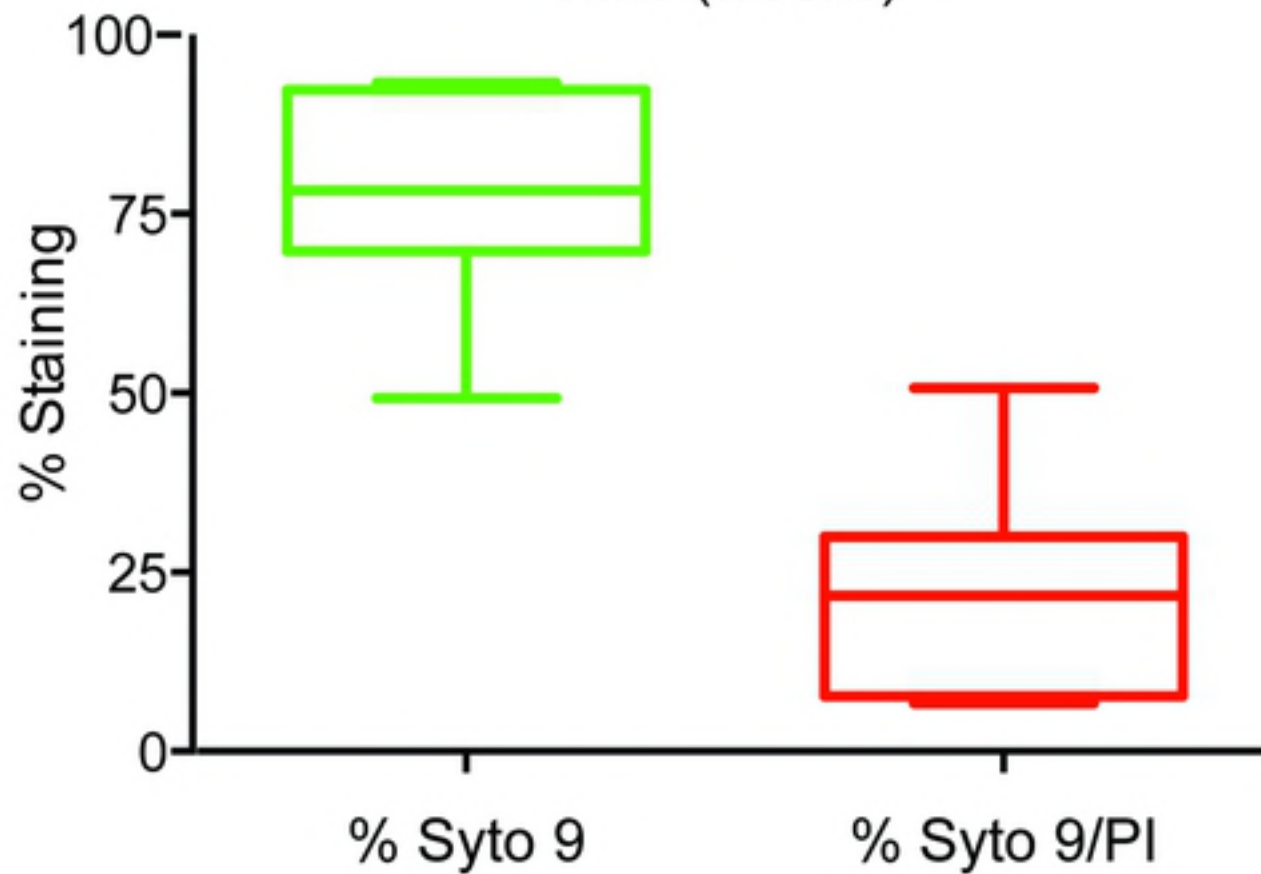

A

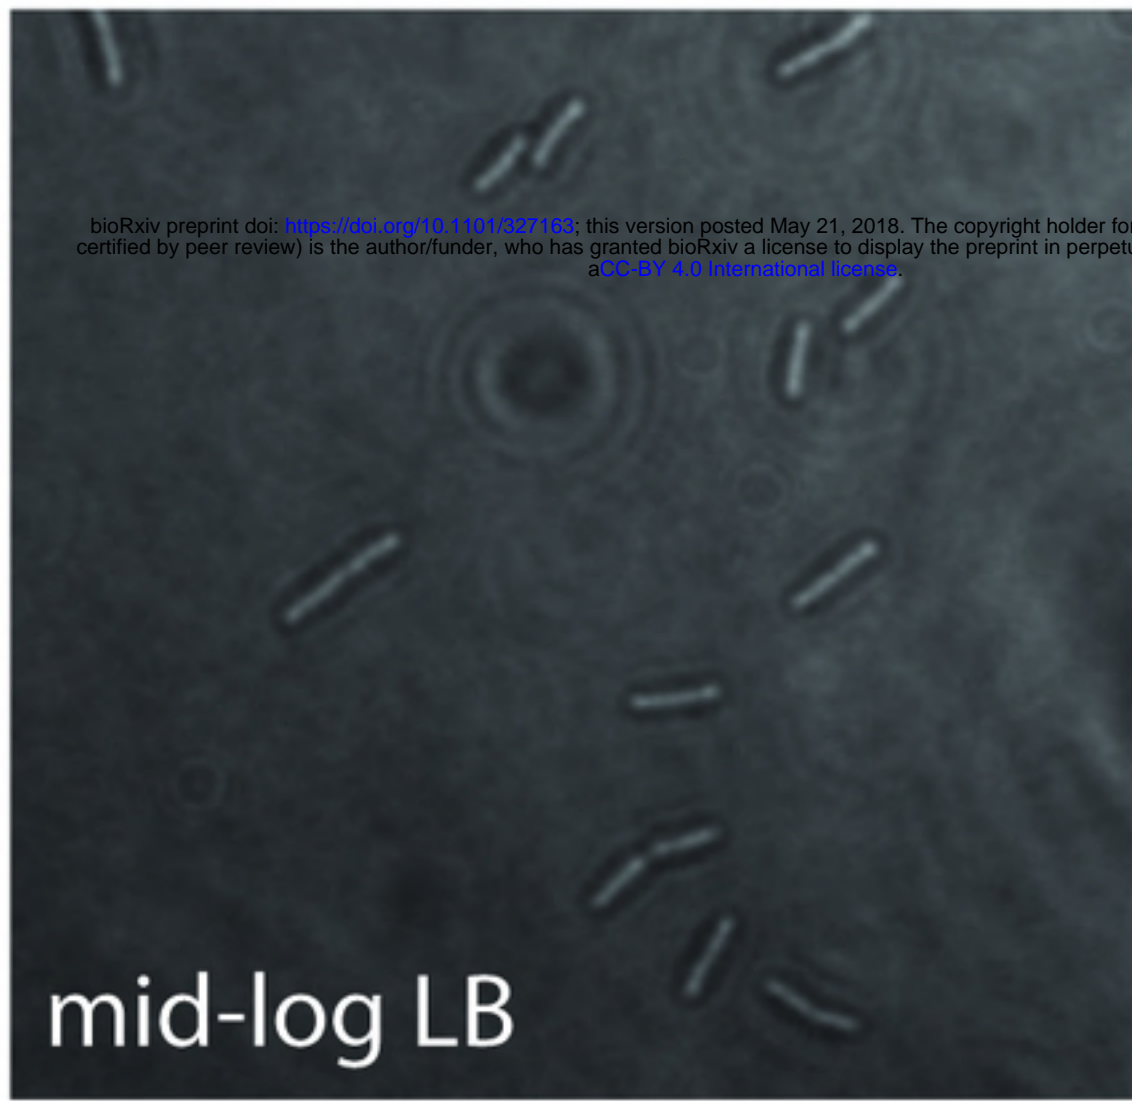

B

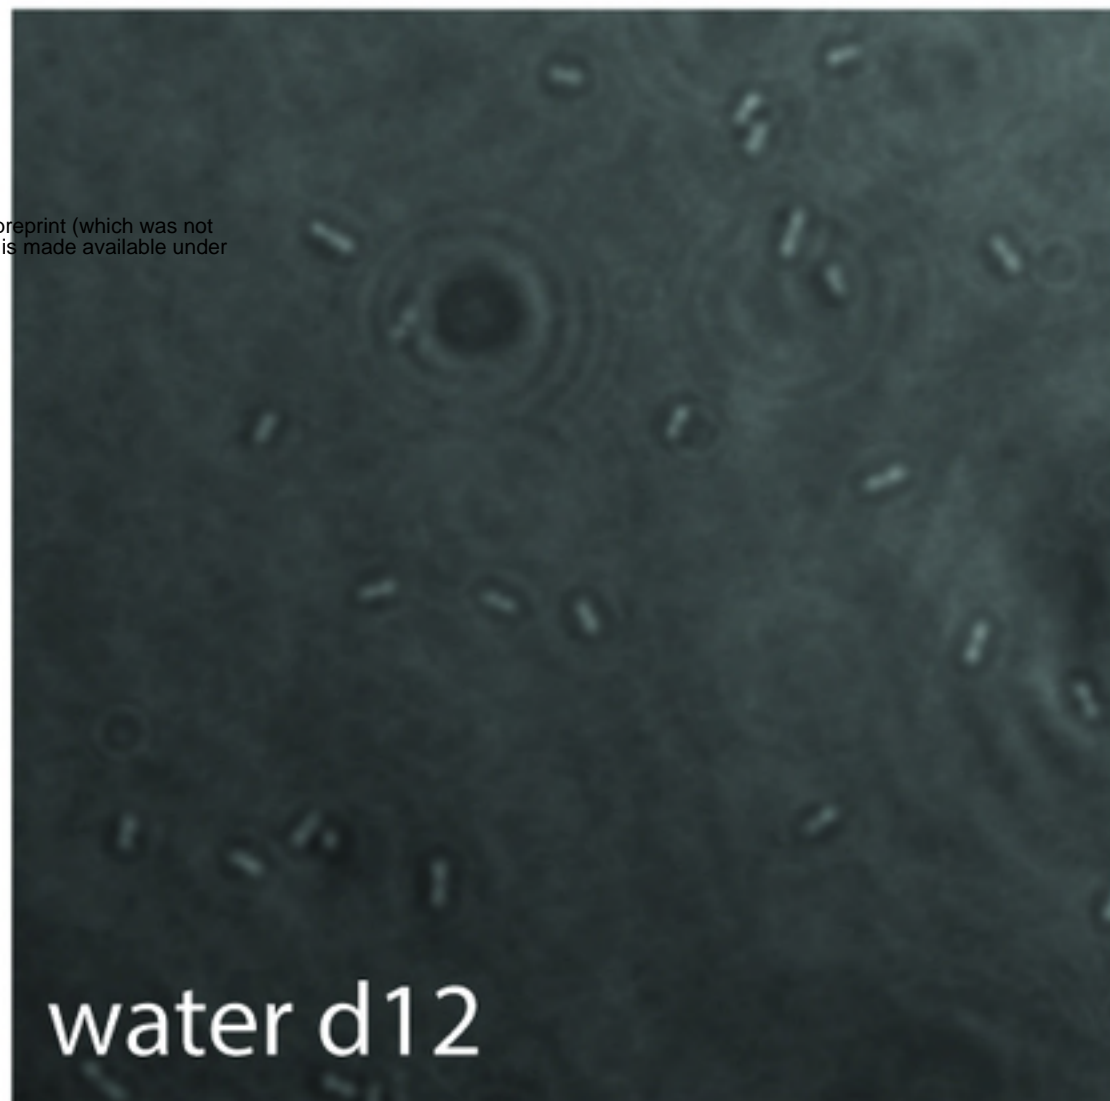

C

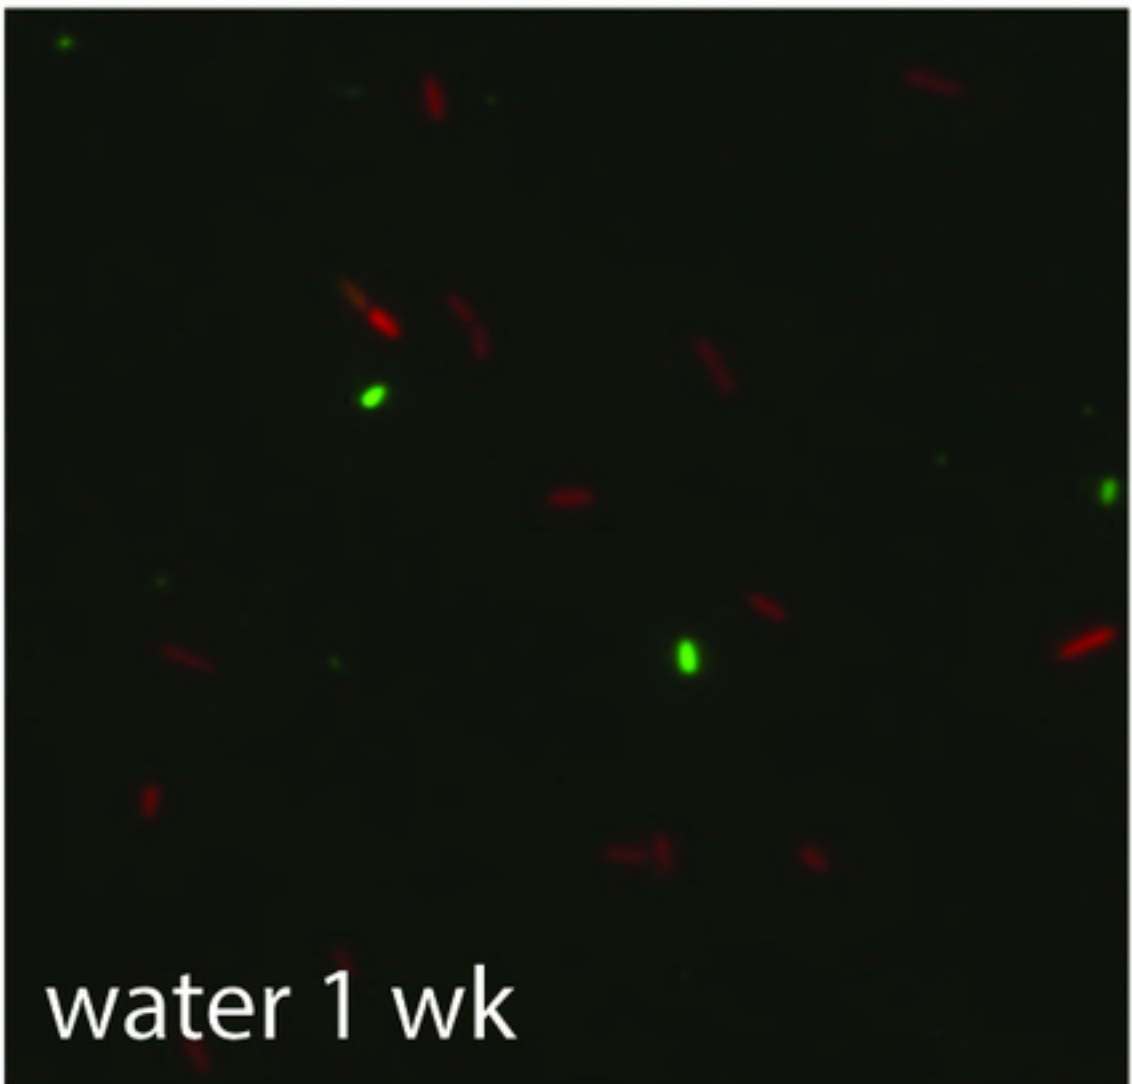

D

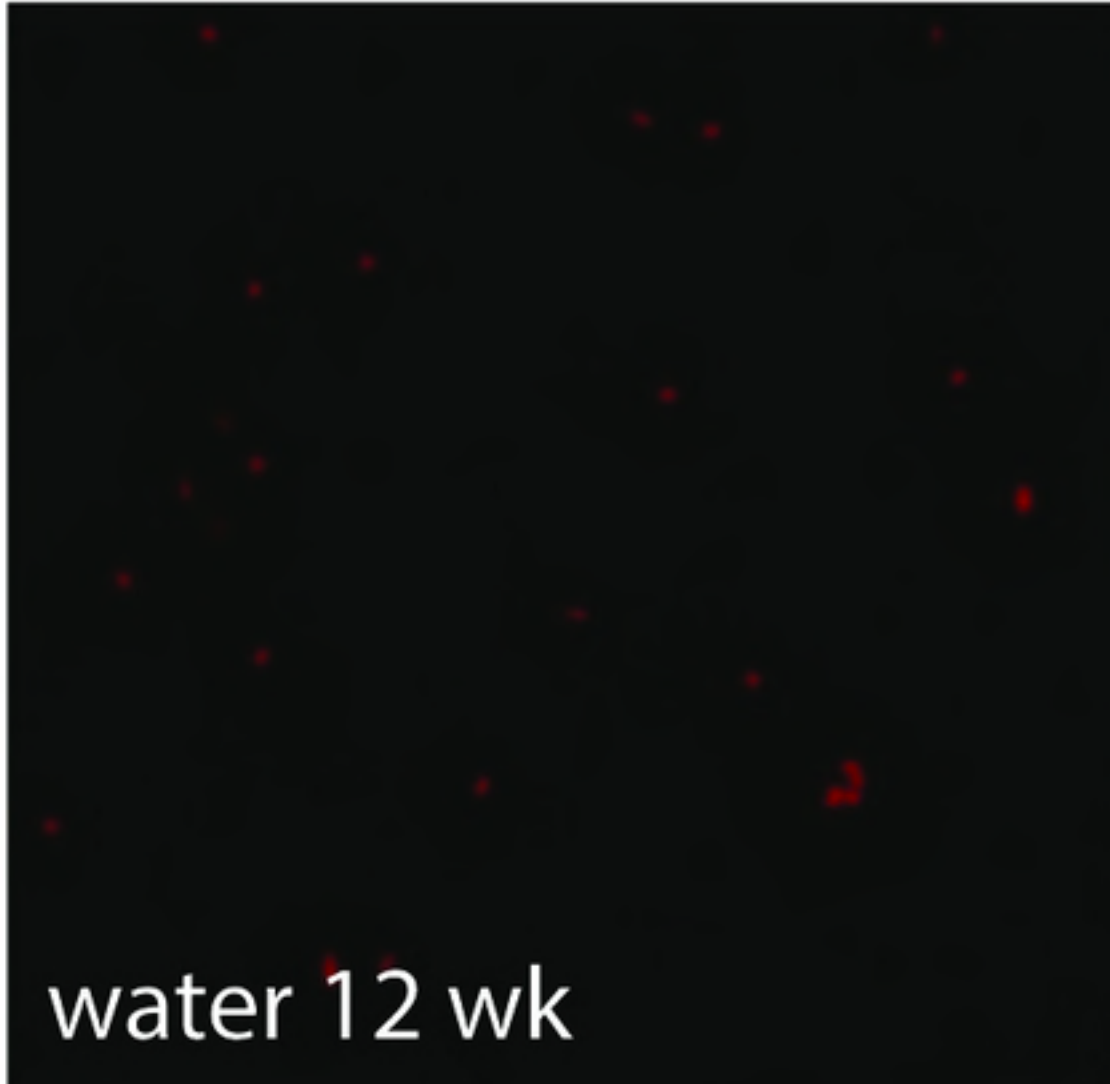



**SSC**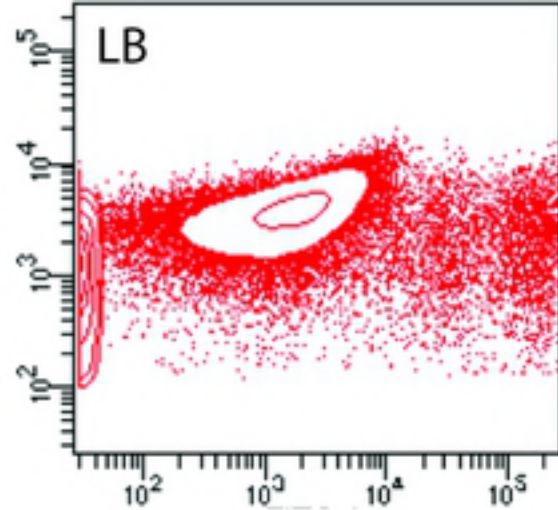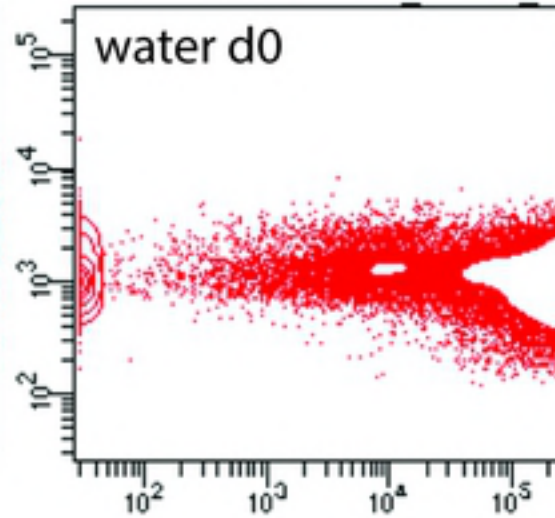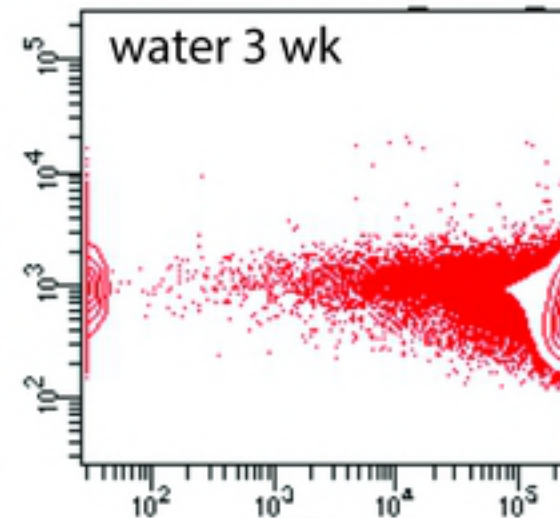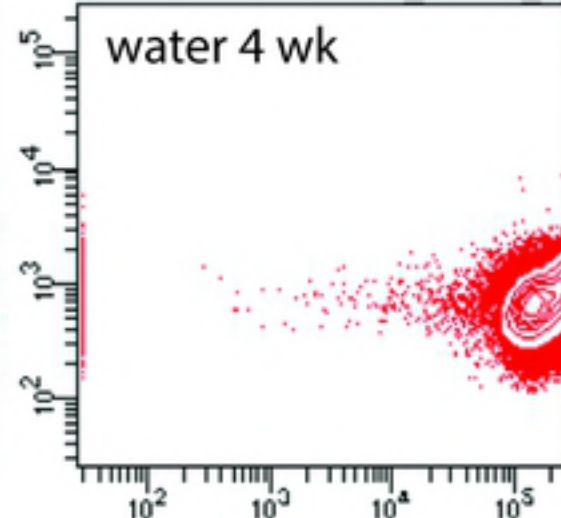**Picogreen fluorescence**

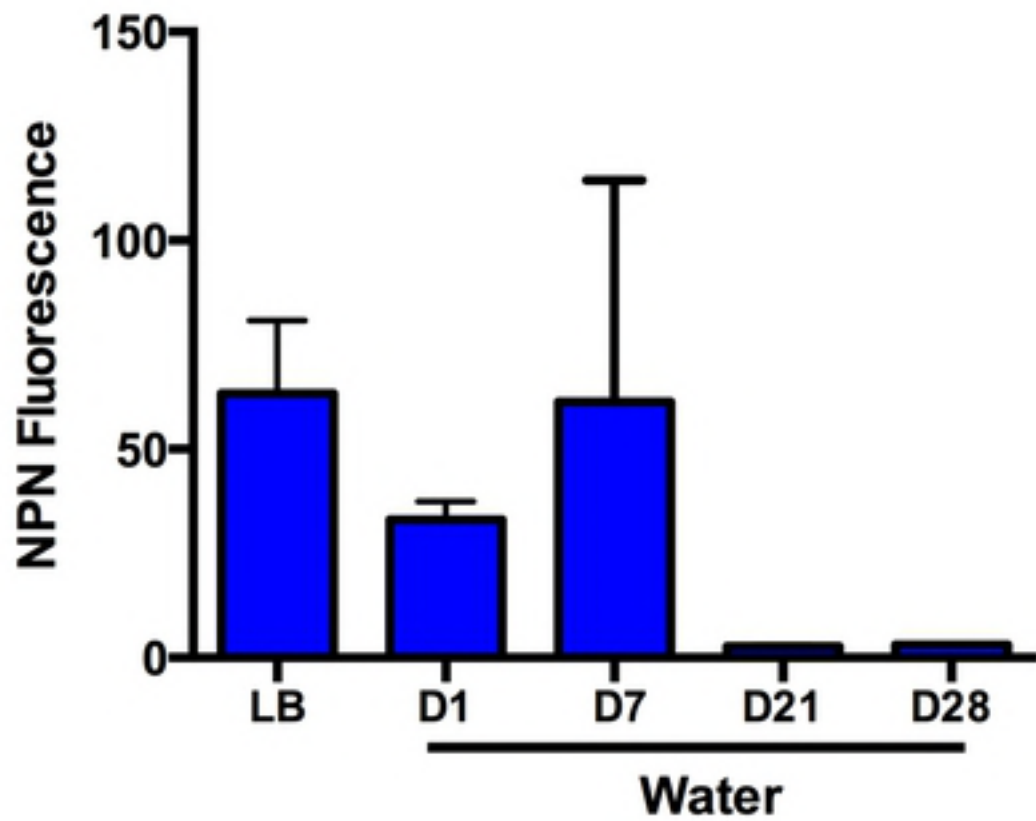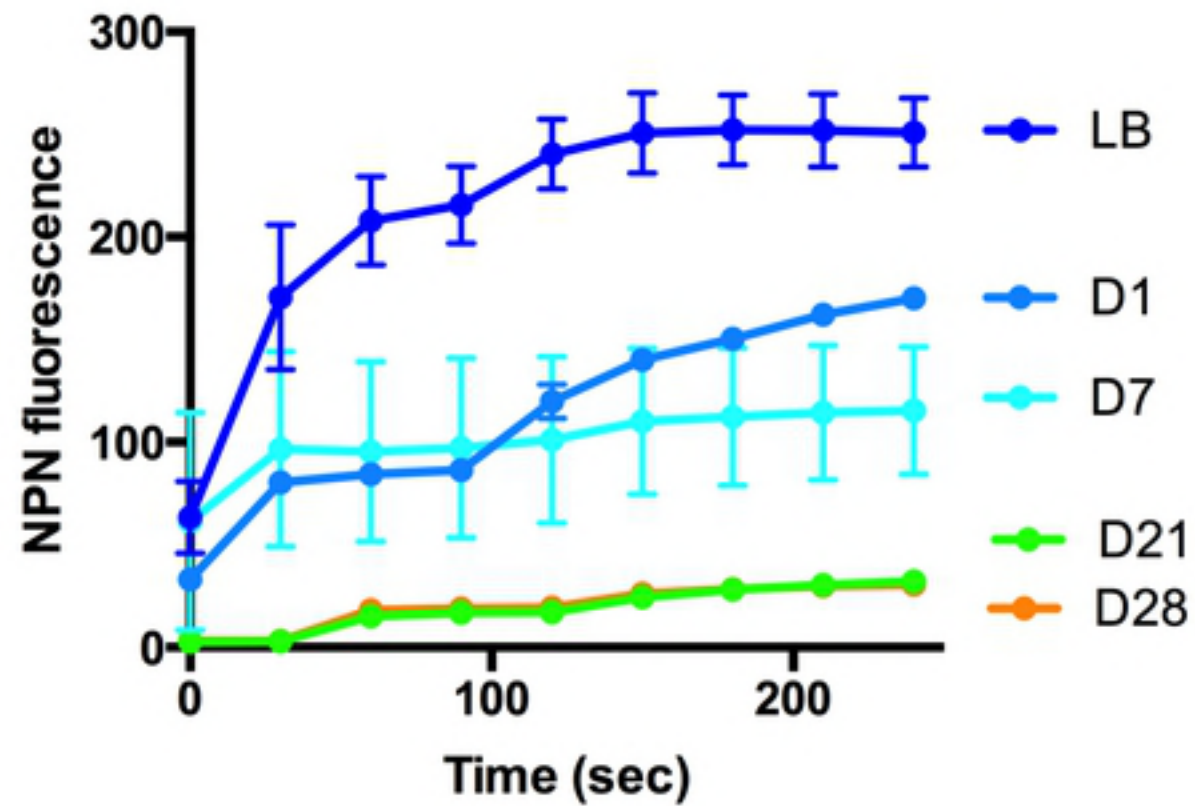

**BM2**

**Water**

400  $\mu$ M 1.6 mM

d0

d7

d14

PE

OL

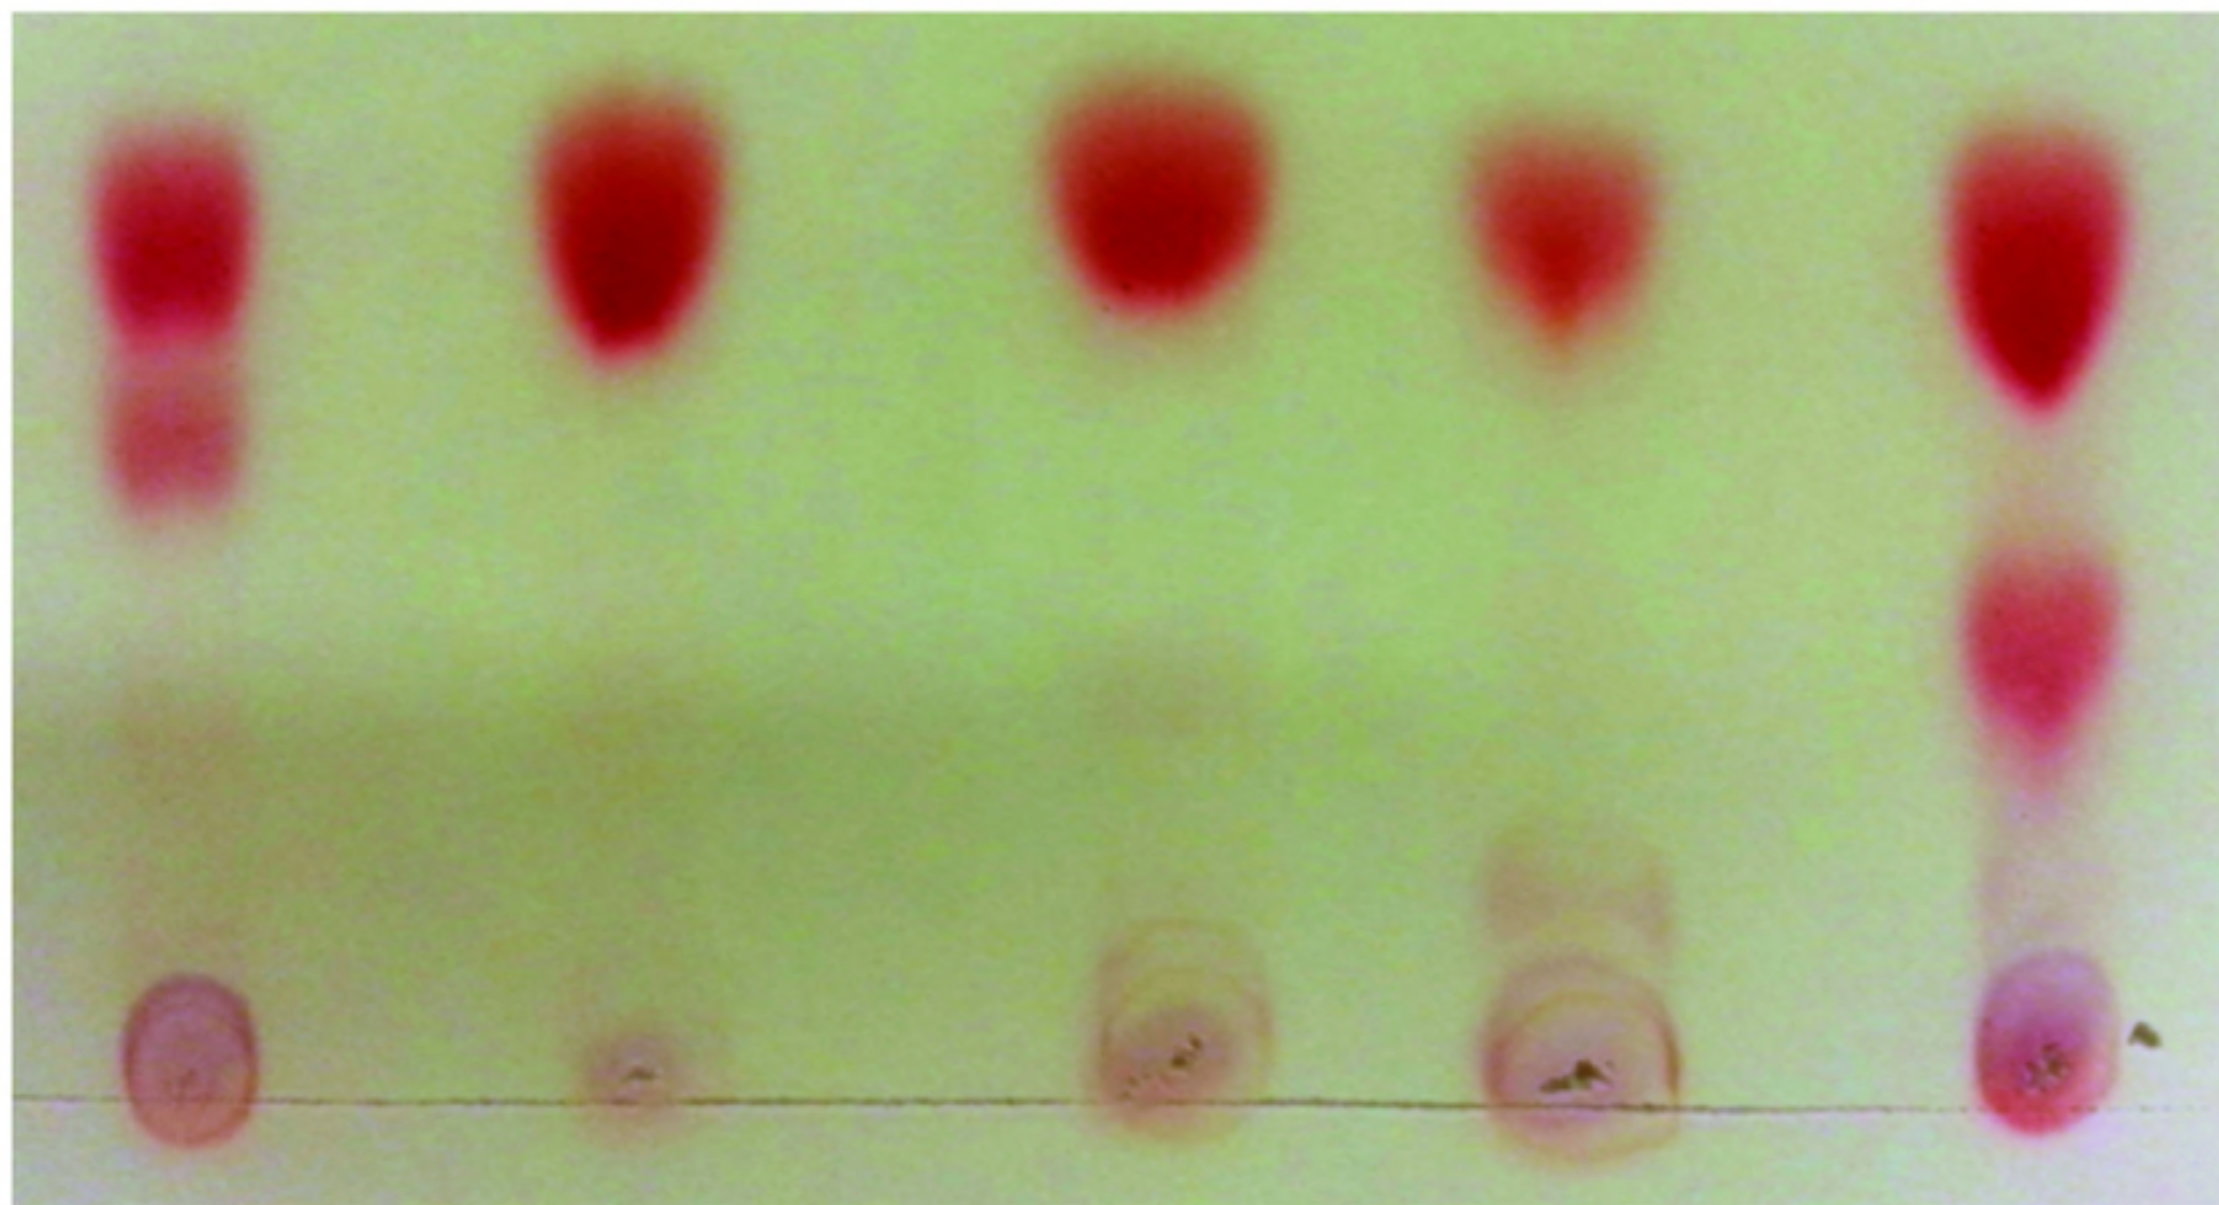

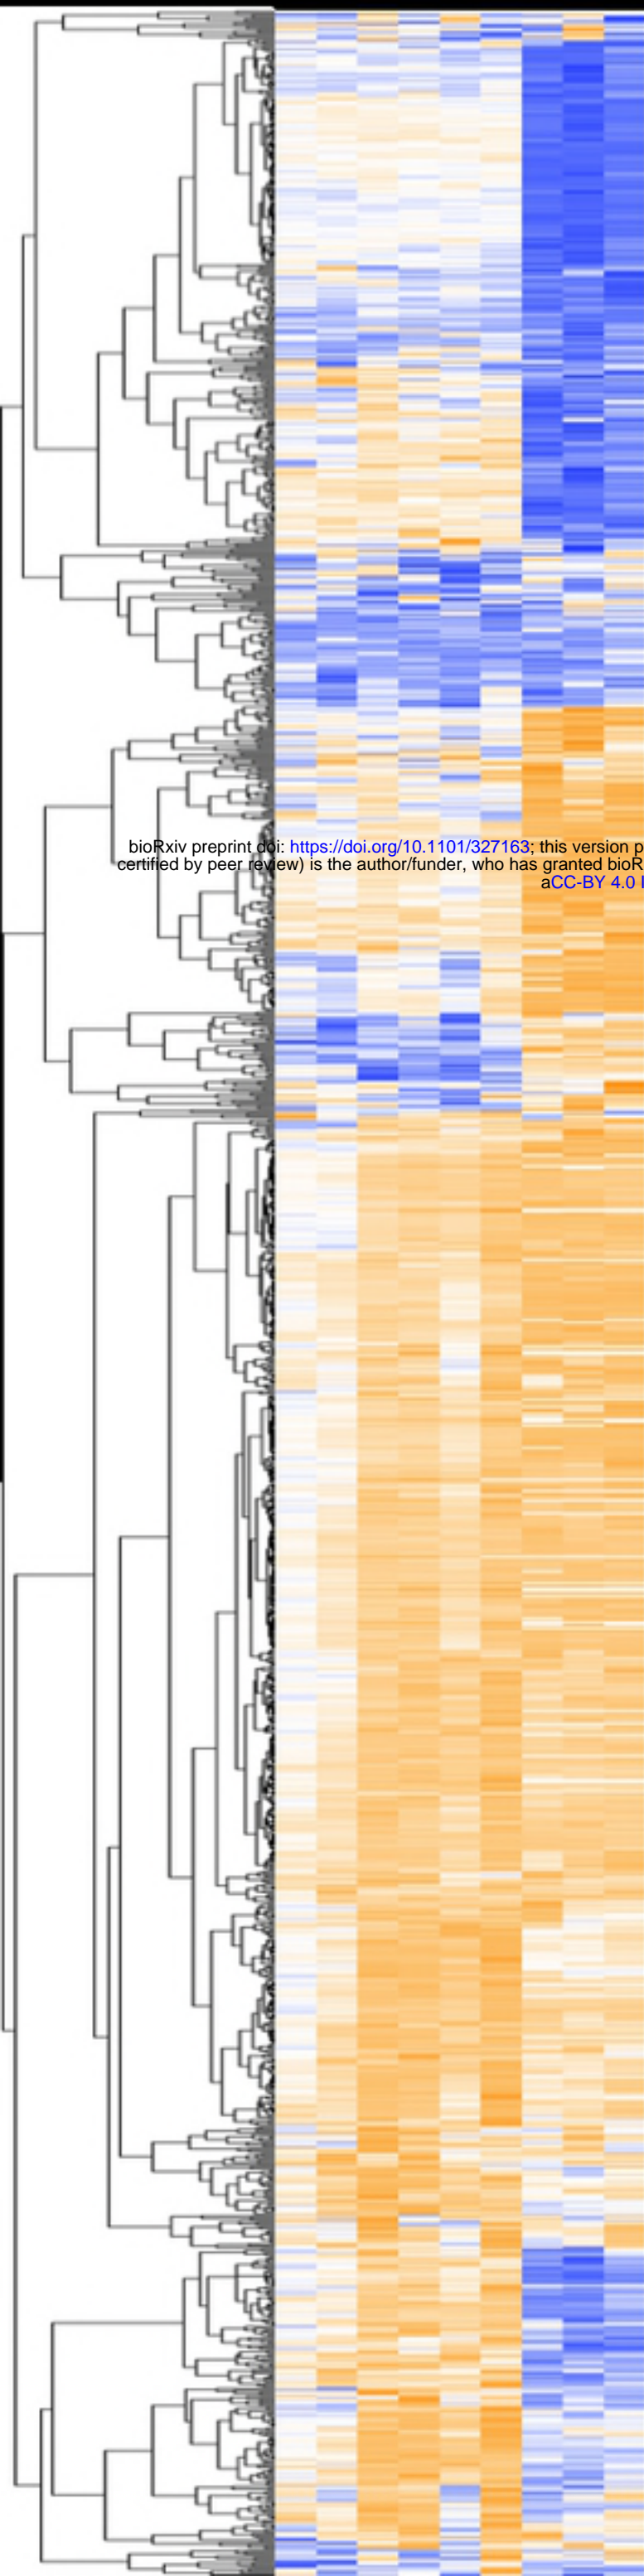

bioRxiv preprint doi: <https://doi.org/10.1101/327163>; this version posted [unclear] certified by peer review) is the author/funder, who has granted bioRxiv a license to display the preprint in perpetuity. It is made available under aCC-BY 4.0 International license.
